# Supplementary material
Source: Research Square preprint supplement (doi:10.21203/rs.3.rs-8669464/v1)
Supplement: Supplementary file 1 [file d7638930f04ab6ae6a28933b.docx]

**Supplementary Materials**

**CONTENTS**

Experimental Section…...............................................................................................S1

Supplementary Figures S1-S10....................................................................................S4

Supplementary Tables S1-S10…............................................... ...............................S15

Explanations for B alerts in crystal structures….............................................S23

Supplementary References......................................................................S24

**Experimental Section**

**Methods**

**Synthesis of [LaIII2(MoIV3O4)2(MoVIO3)6(HPIIIO3)7(PVO4)2py6]·4Hpy·2H3O·9H2O (1)**

[Mo3O2(O2CMe)6(H2O)3]ZnCl4·8H2O as the precursor was prepared according to the published procedure in our previous work.S1,S2 The MoIV precursor [Mo3O2(O2CMe)6(H2O)3]ZnCl4·8H2O (0.049 g, 0.053 mmol) and LaCl3 (2.9 mg, 0.012 mmol) and 80% H3PO3 solution (17 μL, 0.140 mmol) were added in a 20 mL Teflon-lined autoclave containing 4.8 mL of pyridine, 1.2 mL of water, which were sealed in a stainless-steel and heated under autogenous pressure to 120 °C for 12 h. Then, the mixture was cooled to room temperature at a rate of 1.4 K h-1 that produced dark red hexagonal crystals (~40% yield based on Mo). Anal. calcd. (%): For C50H85N10O66P9Mo12La2 (Mr. = 3590.09): C, 16.73; H, 2.39; N, 3.90; P, 7.76, Mo, 32.07; La, 7.74. Found (%): C, 16.49; H, 2.40; N, 3.81; P, 7.74; Mo, 28.93; La, 7.74. IR: (KBr, cm-1): 3458 (H2O), 3072 (py), 2424 (P-H), 1607 (py), 1449 (py), 1070 (P-O), 916 (MoVI=O), 885 (MoVI=Ob-Mo), 758 (MoIV3O4).

**Synthesis of [CeIII2(MoIV3O4)2(MoVIO3)6(HPIIIO3)7(PVO4)2py6]·4Hpy·2H2O·9H2O (2)**

The preparation process of **2** is similar to that of **1**, except that anhydrous LaCl3 was replaced by CeCl3·7H2O (4.5 mg, 0.012 mmol). Dark red hexagonal crystals of **2** were harvested (~40% yield based on Mo). Anal. calcd. (%): For C50H85N10O66P9Mo12Ce2 (Mr. = 3592.51): C, 16.72; H, 2.38; N, 3.90; P, 7.76; Mo, 32.05; Ce, 7.80. Found (%): C, 16.45; H, 2.48; N, 3.87; P, 6.02; Mo, 29.70; Ce, 7.66. IR: (KBr, cm-1): 3451 v (H2O), 3070 m (py), 2424 m (P-H), 1607 s (py), 1448 s (py), 1076 vs (P-O), 914 vs (MoVI=O), 883 vs (MoVI=Ob-Mo), 760 vs (MoIV3O4).

**Synthesis of [PrIII2(MoIV3O4)2(MoVIO3)6(HPIIIO3)7(PVO4)2py6]·4Hpy·2H2O·9H2O (3)**

The preparation process of **3** is similar to that of **1**, except that anhydrous LaCl3 was replaced by PrCl3·6H2O (4.5 mg, 0.012 mmol). Dark red hexagonal crystals of **3** were harvested (~40% yield based on Mo). Anal. calcd. (%): For C50H85N10O66P9Mo12Pr2 (Mr. = 3594.10): C, 16.71; H, 2.38; N, 3.90; P, 7.76; Mo, 32.03; Pr, 7.84. Found (%): C, 16.54; H, 2.38; N, 3.81; P, 7.65; Mo, 29.54; Pr, 5.40. IR: (KBr, cm-1): 3460 v (H2O), 3073 m (py), 2424 m (P-H), 1607 s (py), 1448 s (py), 1076 vs (P-O), 916 vs (MoVI=O), 885 vs (MoVI=Ob-Mo), 760 vs (MoIV3O4).

**Synthesis of [NdIII2(MoIV3O4)2(MoVIO3)6(HPIIIO3)7(PVO4)2py6]·4Hpy·2H2O·9H2O (4)**

The preparation process of **4** is similar to that of **1**, except that anhydrous LaCl3 was replaced by NdCl3·6H2O (4.5 mg, 0.012 mmol). Dark red hexagonal crystals of **4** were harvested (~40% yield based on Mo). Anal. calcd. (%): For C50H85N10O66P9Mo12Nd2 (Mr. = 3600.77): C, 16.68; H, 2.38; N, 3.89; P, 7.74; Mo, 31.97; Nd, 8.01. Found (%): C, 15.64; H, 2.51; N, 3.68; P, 7.92; Mo, 29.45; Nd, 8.05. IR: (KBr, cm-1): 3468 v (H2O), 3071 m (py), 2424 m (P-H), 1607 s (py), 1448 s (py), 1076 vs (P-O), 914 vs (MoVI=O), 883 vs (MoVI=Ob-Mo), 760 vs (MoIV3O4).

**Synthesis of [SmIII2(MoIV3O4)2(MoVIO3)6(HPIIIO3)7(PVO4)2py6]·4Hpy·2H2O·9H2O (5)**

The MoIV precursor [Mo3O2(O2CMe)6(H2O)3]ZnCl4·8H2O (0.082 g, 0.076 mmol), anhydrous SmCl3 (4.6 mg, 0.018 mmol) and 80% H3PO3 solution (30 μL, 0.246 mmol) were added in a 20 mL Teflon-lined autoclave containing 5.6 mL of pyridine, 2.4 mL of water, which were sealed in a stainless-steel and heated under autogenous pressure to 120 °C for 12 h. Then, the mixture was cooled to room temperature at a rate of 1.4 K h-1 that produced dark red hexagonal crystals. Dark red hexagonal crystals of **5** were harvested (30% yield based on Mo). Anal. calcd. (%): For C50H85N10O66P9Mo12Sm2 (Mr. = 3613.00): C, 16.62; H, 2.37; N, 3.88; P, 7.72; Mo, 31.86; Sm, 8.32. Found (%): C, 16.55; H, 2.34; N, 3.83; P, 7.56; Mo, 28.82; Sm, 7.14. IR: (KBr, cm-1): 3429 v (H2O), 3068 m (py), 2418 m (P-H), 1607 s (py), 1448 s (py), 1080 vs (P-O), 916 s (MoVI=O), 885 s (MoVI=Ob-Mo), 758 vs (MoIV3O4).

**Synthesis of [EuIII2(MoIV3O4)2(MoVIO3)6(HPIIIO3)7(PVO4)2py6]·4Hpy·2H2O·9H2O (6)**

The preparation process of **6** is similar to that of **5**, except thatthe MoIV precursor [Mo3O2(O2CMe)6(H2O)3]ZnCl4·8H2O (0.088 g, 0.082 mmol), EuCl3·6H2O (7.1 mg, 0.0195 mmol) and 80% H3PO3 solution (38 μL, 0.32 mmol) were adopted. Dark red hexagonal crystals of **6** were harvested (~35% yield based on Mo). Anal. calcd. (%): For C50H85N10O66P9Mo12Eu2 (Mr. = 3616.21): C, 16.61; H, 2.37; N, 3.87; P, 7.71; Mo, 31.84; Eu, 8.40. Found (%): C, 16.59; H, 2.37; N, 3.88; P, 7.37; Mo, 28.08; Eu, 6.36. IR: (KBr, cm-1): 3421 s (H2O), 3069 m (py), 2421 m (P-H), 1607 s (py), 1448 s (py), 1082 vs (P-O), 916 s (MoVI=O), 885 vs (MoVI=Ob-Mo), 758 vs (MoIV3O4).

**Synthesis of [GdIII2(MoIV3O4)2(MoVIO3)6(HPIIIO3)7(PVO4)2py6]·4Hpy·2H2O·9H2O (7)**

The preparation process of **7-Gd** is similar to that of **5-Sm**, except thatthe MoIV precursor [Mo3O2(O2CMe)6(H2O)3]ZnCl4·8H2O (0.110 g, 0.10 mmol), GdCl3·6H2O (8.9 mg, 0.024 mmol) and 80% H3PO3 solution (52 μL, 0.43 mmol) were adopted. Dark red hexagonal crystals of **7** were harvested (>30% yield based on Mo). Anal. calcd. (%): For C50H85N10O66P9Mo12Gd2 (Mr. = 3626.78): C, 16.56; H, 2.36; N, 3.86; P, 7.69; Mo, 31.74; Gd, 8.67. Found (%): C, 17.15; H, 2.33; N, 3.95; P, 7.80; Mo, 28.73; Gd, 8.24. IR: (KBr, cm-1): 3431 v (H2O), 3069 m (py), 2421 m (P-H), 1607 s (py), 1447 s (py), 1082 vs (P-O), 916 s (MoVI=O), 883 vs (MoVI=Ob-Mo), 758 vs (MoIV3O4).

**Synthesis of [SmIII2(MoIV3O4)2(MoVIO3)6(HPIIIO3)7(PVO4)2py6]·3Hpy·3H3O·10H2O (8)**

The MoIV precursor [Mo3O2(O2CMe)6(H2O)3]ZnCl4·8H2O (0.082 g, 0.076 mmol), anhydrous SmCl3 (4.6 mg, 0.018 mmol) and 80% H3PO3 solution (30 μL, 0.246 mmol) were added in a 20 mL Teflon-lined autoclave containing 6 mL of pyridine, 2 mL of water, which were sealed in a stainless-steel and heated under autogenous pressure to 120 °C for 21 h. Then, the mixture was cooled to room temperature at a rate of 1.4 K h-1 that produced small dark red square crystals. Crimson square crystals of **8-Sm** were harvested (< 10% yield based on Mo).

**Synthesis of [EuIII2(MoIV3O4)2(MoVIO3)6(HPIIIO3)7(PVO4)2py6]·3Hpy·3H3O·10H2O (9)**

The preparation process of **9-Eu** is similar to that of **8-Sm**, except thatthe MoIV precursor [Mo3O2(O2CMe)6(H2O)3]ZnCl4·8H2O (0.110 g, 0.10 mmol), EuCl3·6H2O (7.1 mg, 0.0195 mmol) and 80% H3PO3 solution (52 μL, 0.43 mmol) were adopted. Dark red tetragonal crystals of **9** were harvested (< 10% yield based on Mo).

**Synthesis of** **[GdIII2(MoIV3O4)2(MoVIO3)6(HPIIIO3)7(PVO4)2py6]·3Hpy·3H3O·10H2O (10)**

The preparation process of **10-Gd** is similar to that of **8-Sm**, except thatthe MoIV precursor [Mo3O2(O2CMe)6(H2O)3]ZnCl4·8H2O (0.110 g, 0.10 mmol), GdCl3·6H2O (8.9 mg, 0.024 mmol) and 80% H3PO3 solution (52 μL, 0.43 mmol) were adopted. Dark red tetragonal crystals of **10-Gd** were harvested (< 10% yield based on Mo).

**Synthesis of** **[TbIII2(MoIV3O4)2(MoVIO3)6(HPIIIO3)7(PVO4)2py6]·3Hpy·3H3O·10H2O (11)**

The preparation process of **11-Tb** is similar to that of **8-Sm**, except that the MoIV precursor [Mo3O2(O2CMe)6(H2O)3]ZnCl4·8H2O (0.128 g, 0.13 mmol) and TbCl3·6H2O (10.3 mg, 0.028 mmol) and 80% H3PO3 solution (69 μL, 0.57 mmol) were added in a 20 mL Teflon-lined autoclave containing 4.9 mL of pyridine, 1.1 mL of water, which were sealed in a stainless-steel and heated under autogenous pressure to 115 °C for 12 h. Then, the mixture was cooled to room temperature at a rate of 1.4 K h-1 that produced dark red tetragonal crystals. Dark red tetragonal crystals of **11-Tb** were harvested (~3% yield based on Tb). Anal. calcd. (%): For C45H84N9O68P9Mo12Tb2 (Mr. = 3605.08): C, 15.07; H, 2.36; N, 3.51; P, 7.77; Mo, 32.09; Tb, 8.86. Found (%): C, 15.64; H, 2.28; N, 3.62; P, 7.23; Mo, 33.86; Tb, 8.48. IR: (KBr, cm-1): 3435 v (H2O), 3071 m (py), 2424 m (P-H), 1607 s (py), 1448 s (py), 1082 vs (P-O), 914 s (MoVI=O), 881 vs (MoVI=Ob-Mo), 758 vs (MoIV3O4).

**Characterization**

All chemicals were obtained from commercial sources and without further purification. Elemental analysis (C, H, N) was performed by a vario MICRO elemental analyzer. Inductively coupled plasma optical emission spectroscopy (ICP-OES) analysis (P, Mo, La, Ce, Pr, Nd, Sm, Eu, Gd, Tb) was carried on a PerkinElmer’s Avio 220 Max spectrometer. The thermogravimetric analysis (TGA) were performed on a NETZSCH STA449F3 apparatus in 20~900 ℃ at a heating rate of 10 K min-1 in nitrogen atmosphere. The solid-state UV–vis spectroscopy data were spectra were recorded on a PerkinElmer Lamda-950 UV/Vis spectrophotometer and scanned at 200~1600 nm. Energy dispersive spectroscopy (EDS) analysis was performed on a HITACHI SU-8010 scanning electron microscope (SEM) and an Apreo 2S SEM from ThermoFisher Scientific. Powder X-ray diffraction (PXRD) patterns for all the samples were collected with an X-ray diffractometer (MiniFlex2, RIGAKU) with Cu Kα1 radiation (λ = 0.154187 nm) in the range 5° < 2θ < 55° in θ-θ mode. Comparison between experimental and calculated (from CIF’s) PXRD patterns was performed with Mercury software. The X-ray photoelectron spectroscopy (XPS) characterization was conducted on a ThermoFisher ESCALAB 250Xi using Al Kα (1486.6 eV) radiation source. Electrospray ionization mass spectrometry (ESI–MS) data were collected on a BRÜKER Impact II UHR-TOF LC/MS mass spectrometer. HR-TEM images were obtained using ThermoFisher Talos F200X G2 S-TEM.

**Supplementary Figures**


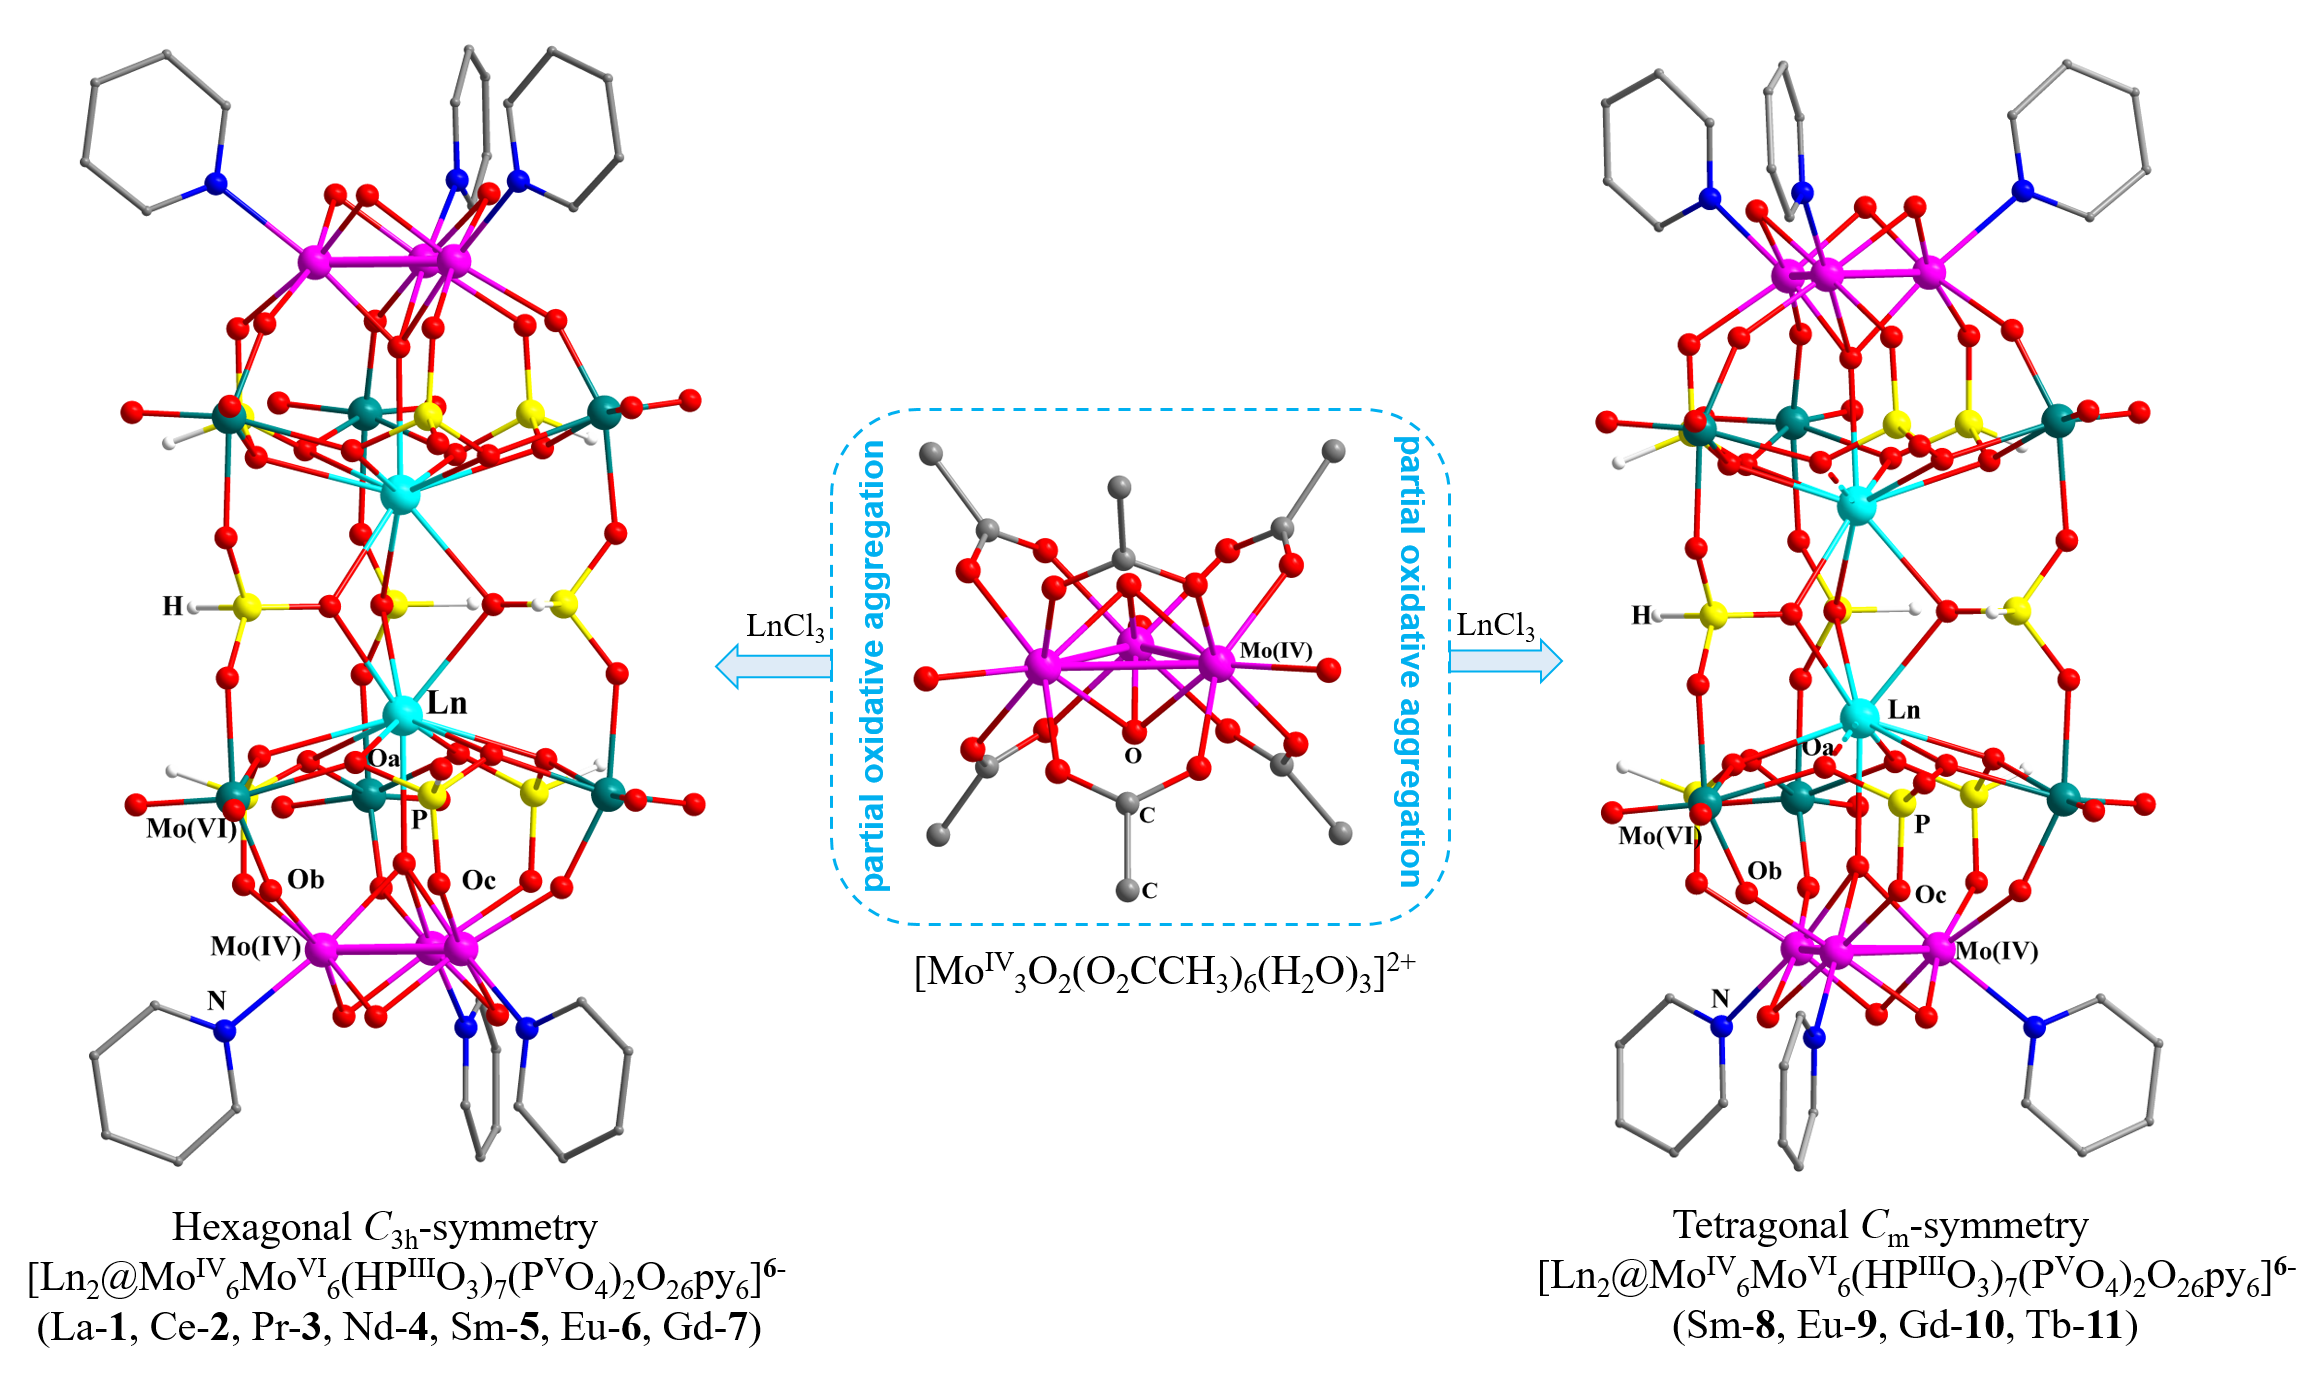


**Fig. S1** Synthesis and structures of hexagonal **1–7** having OaObOcMoVIPMoIV2 seven-membered ring and tetragonal **8–11** with OaObOcMoVIPMoIV six-membered ring through partially oxidative aggregation of [MoIV3O2(O2CCH3)6(H2O)3]2+ and Ln3+ ions. Atom color code: LnIII, turquoise; MoIV, pink; MoVI, dark green; P, yellow; O, red; N, blue; C, dark grey; H, white.


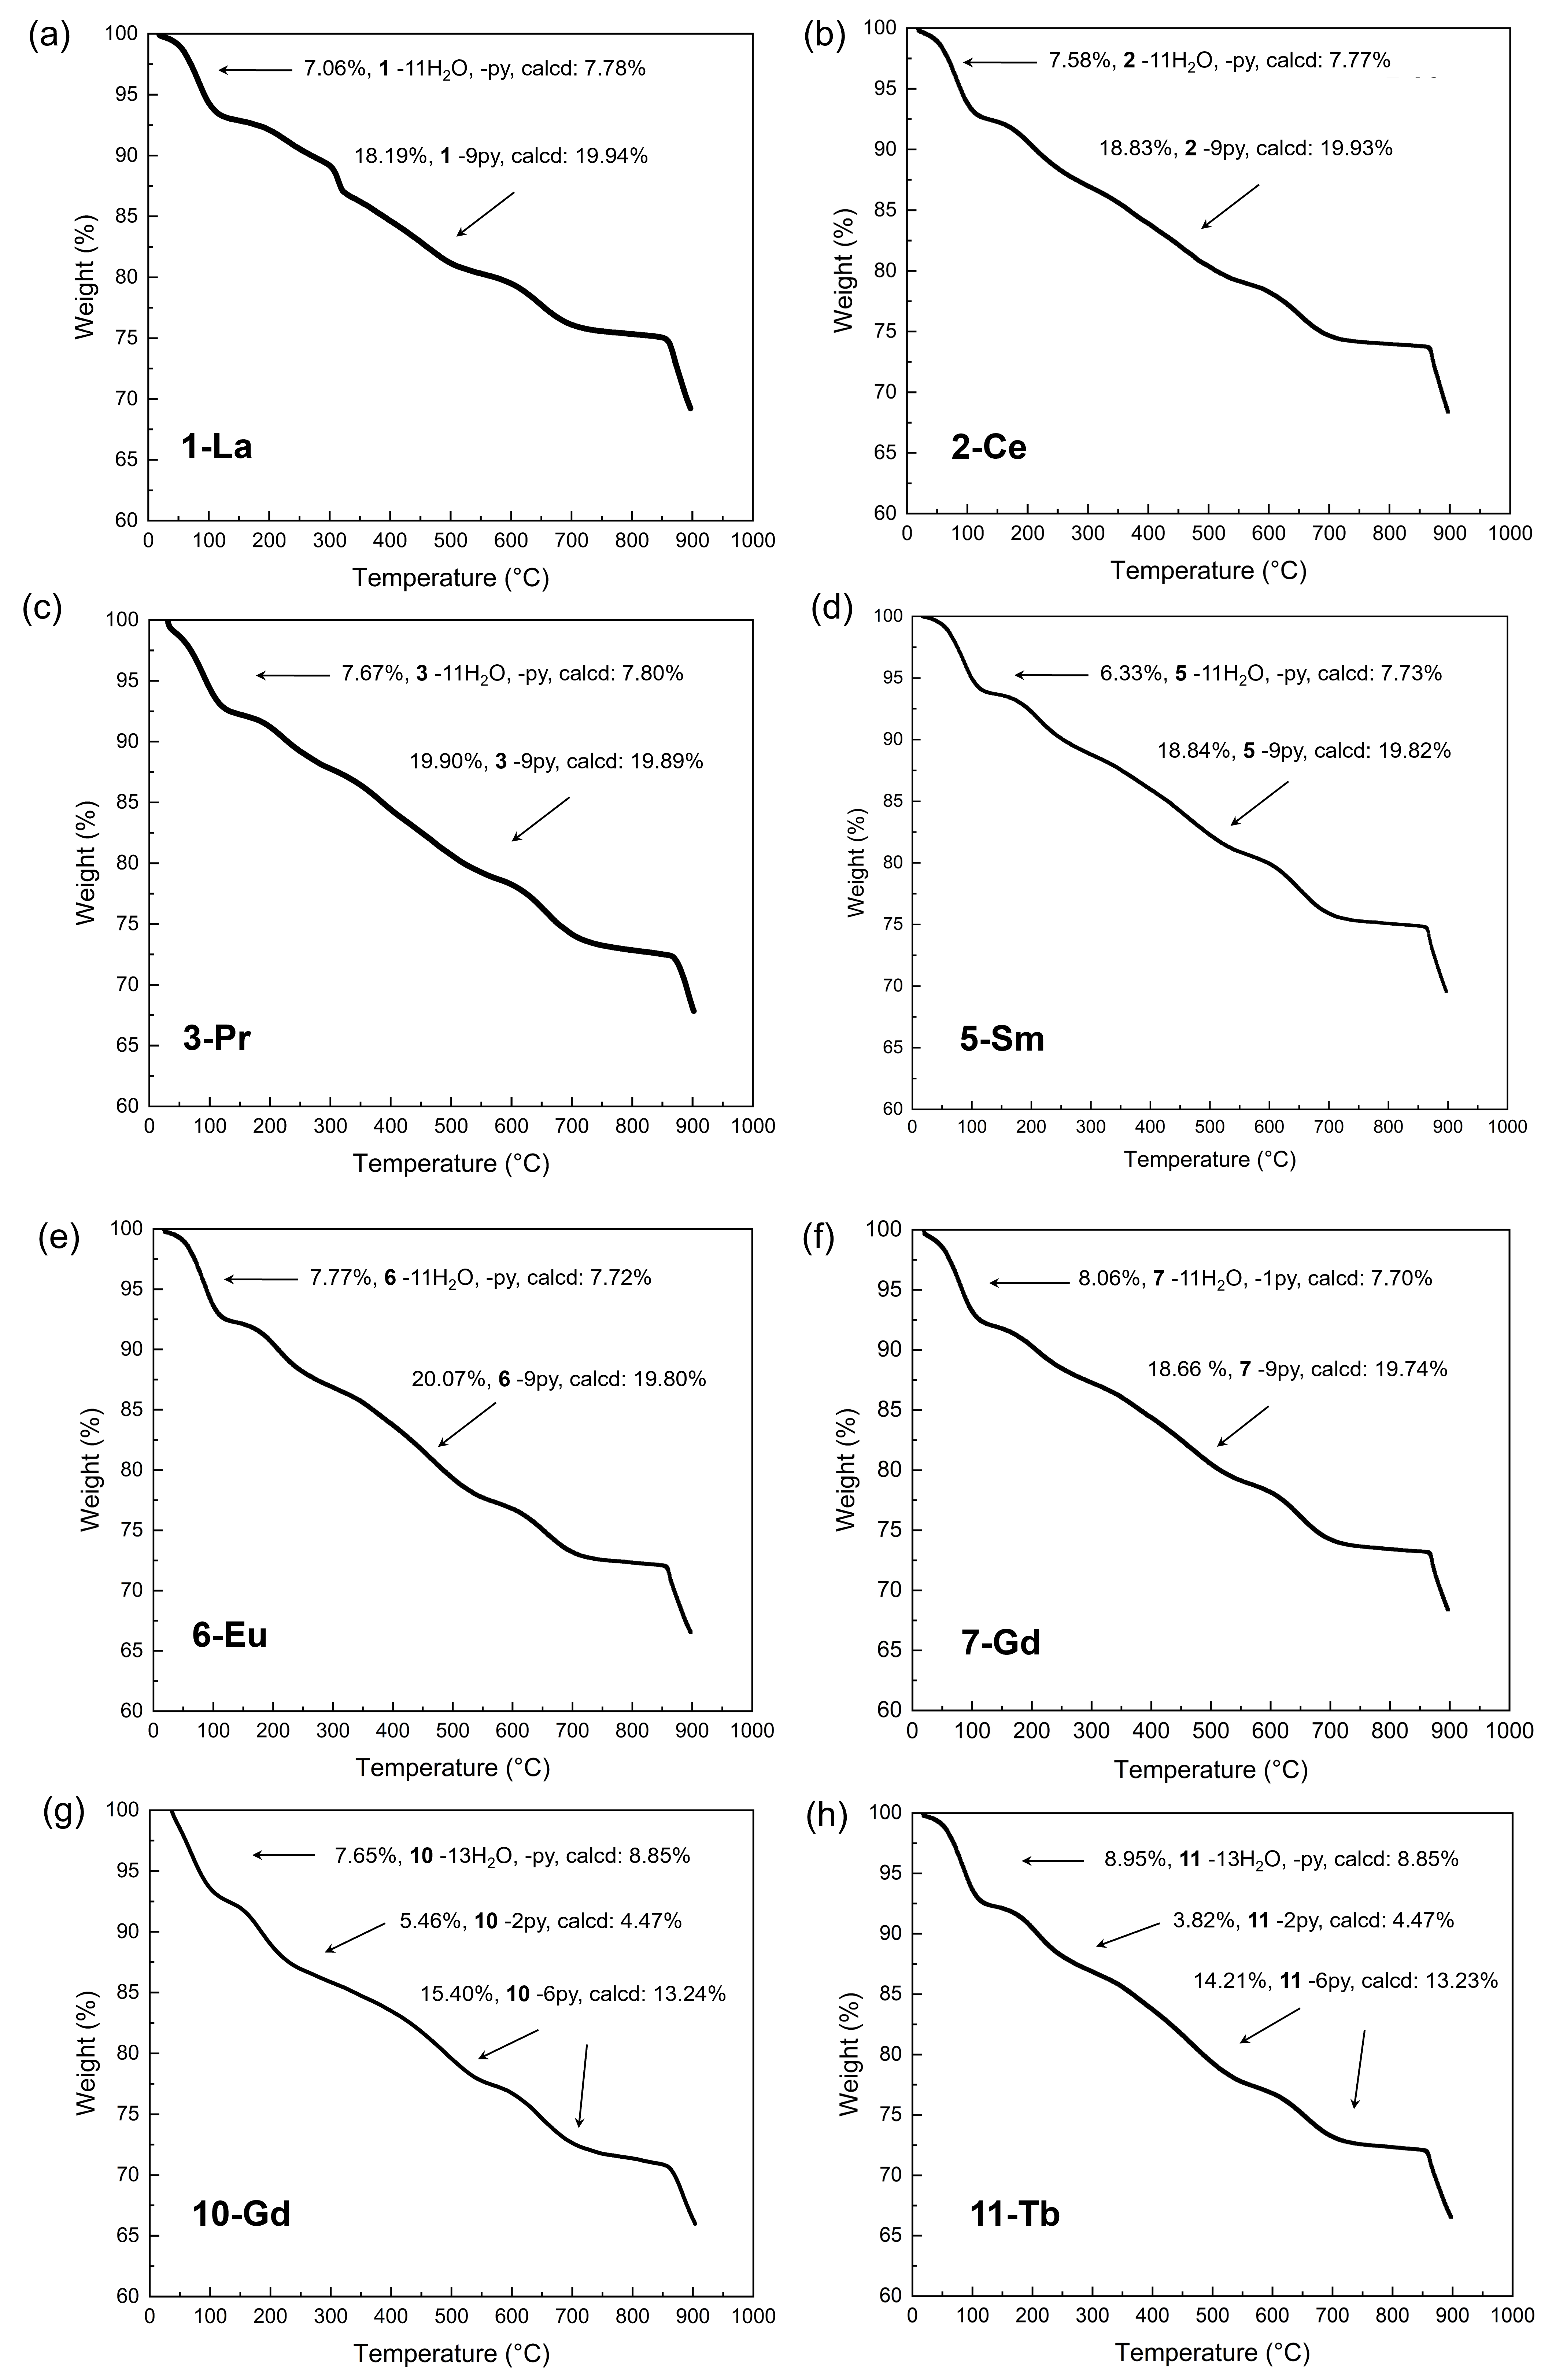


**Fig. S2.** TGA spectra of **1-La** (a), **2-Ce** (b), **3-Pr** (c), **5-Sm** (d), **6-Eu** (e), **7-Gd** (f) and **10-Gd** (g) and **11-Tb** (h)

**
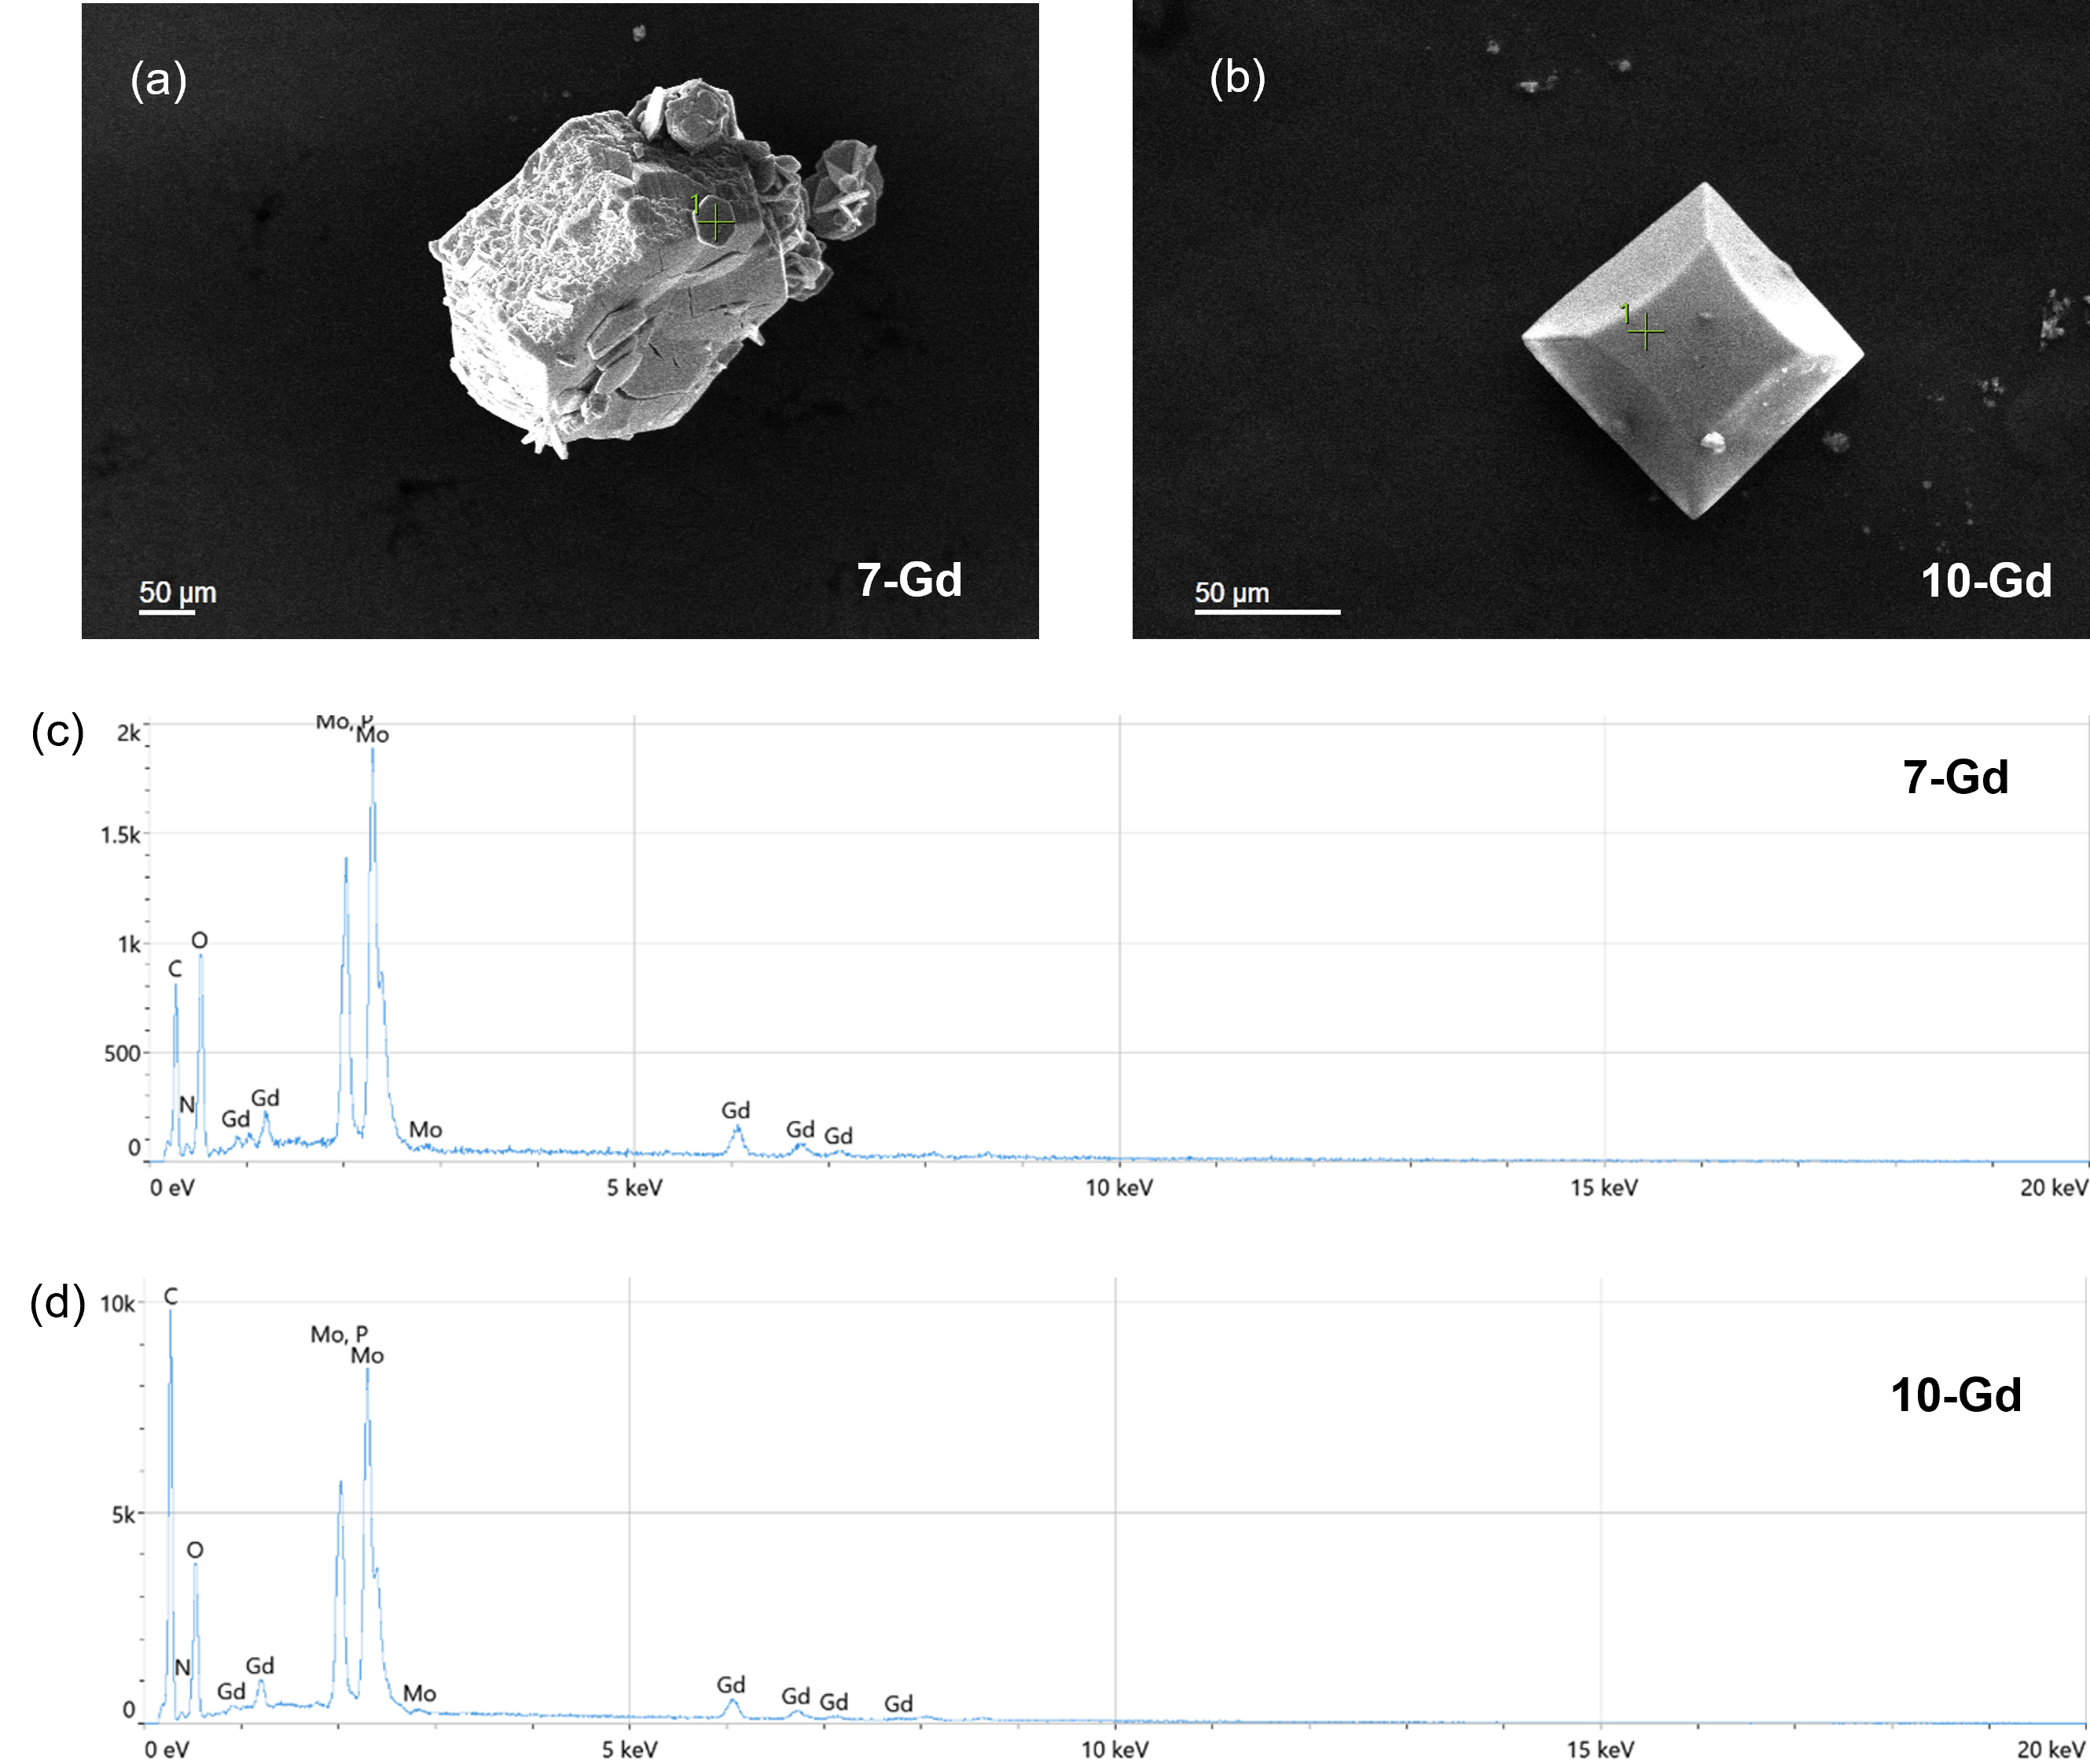
**

**Fig. S3.**  SEM-EDS spectra of hexagonal **7-Gd** (a, c) and tetragonal **10-Gd** (b, d)

**
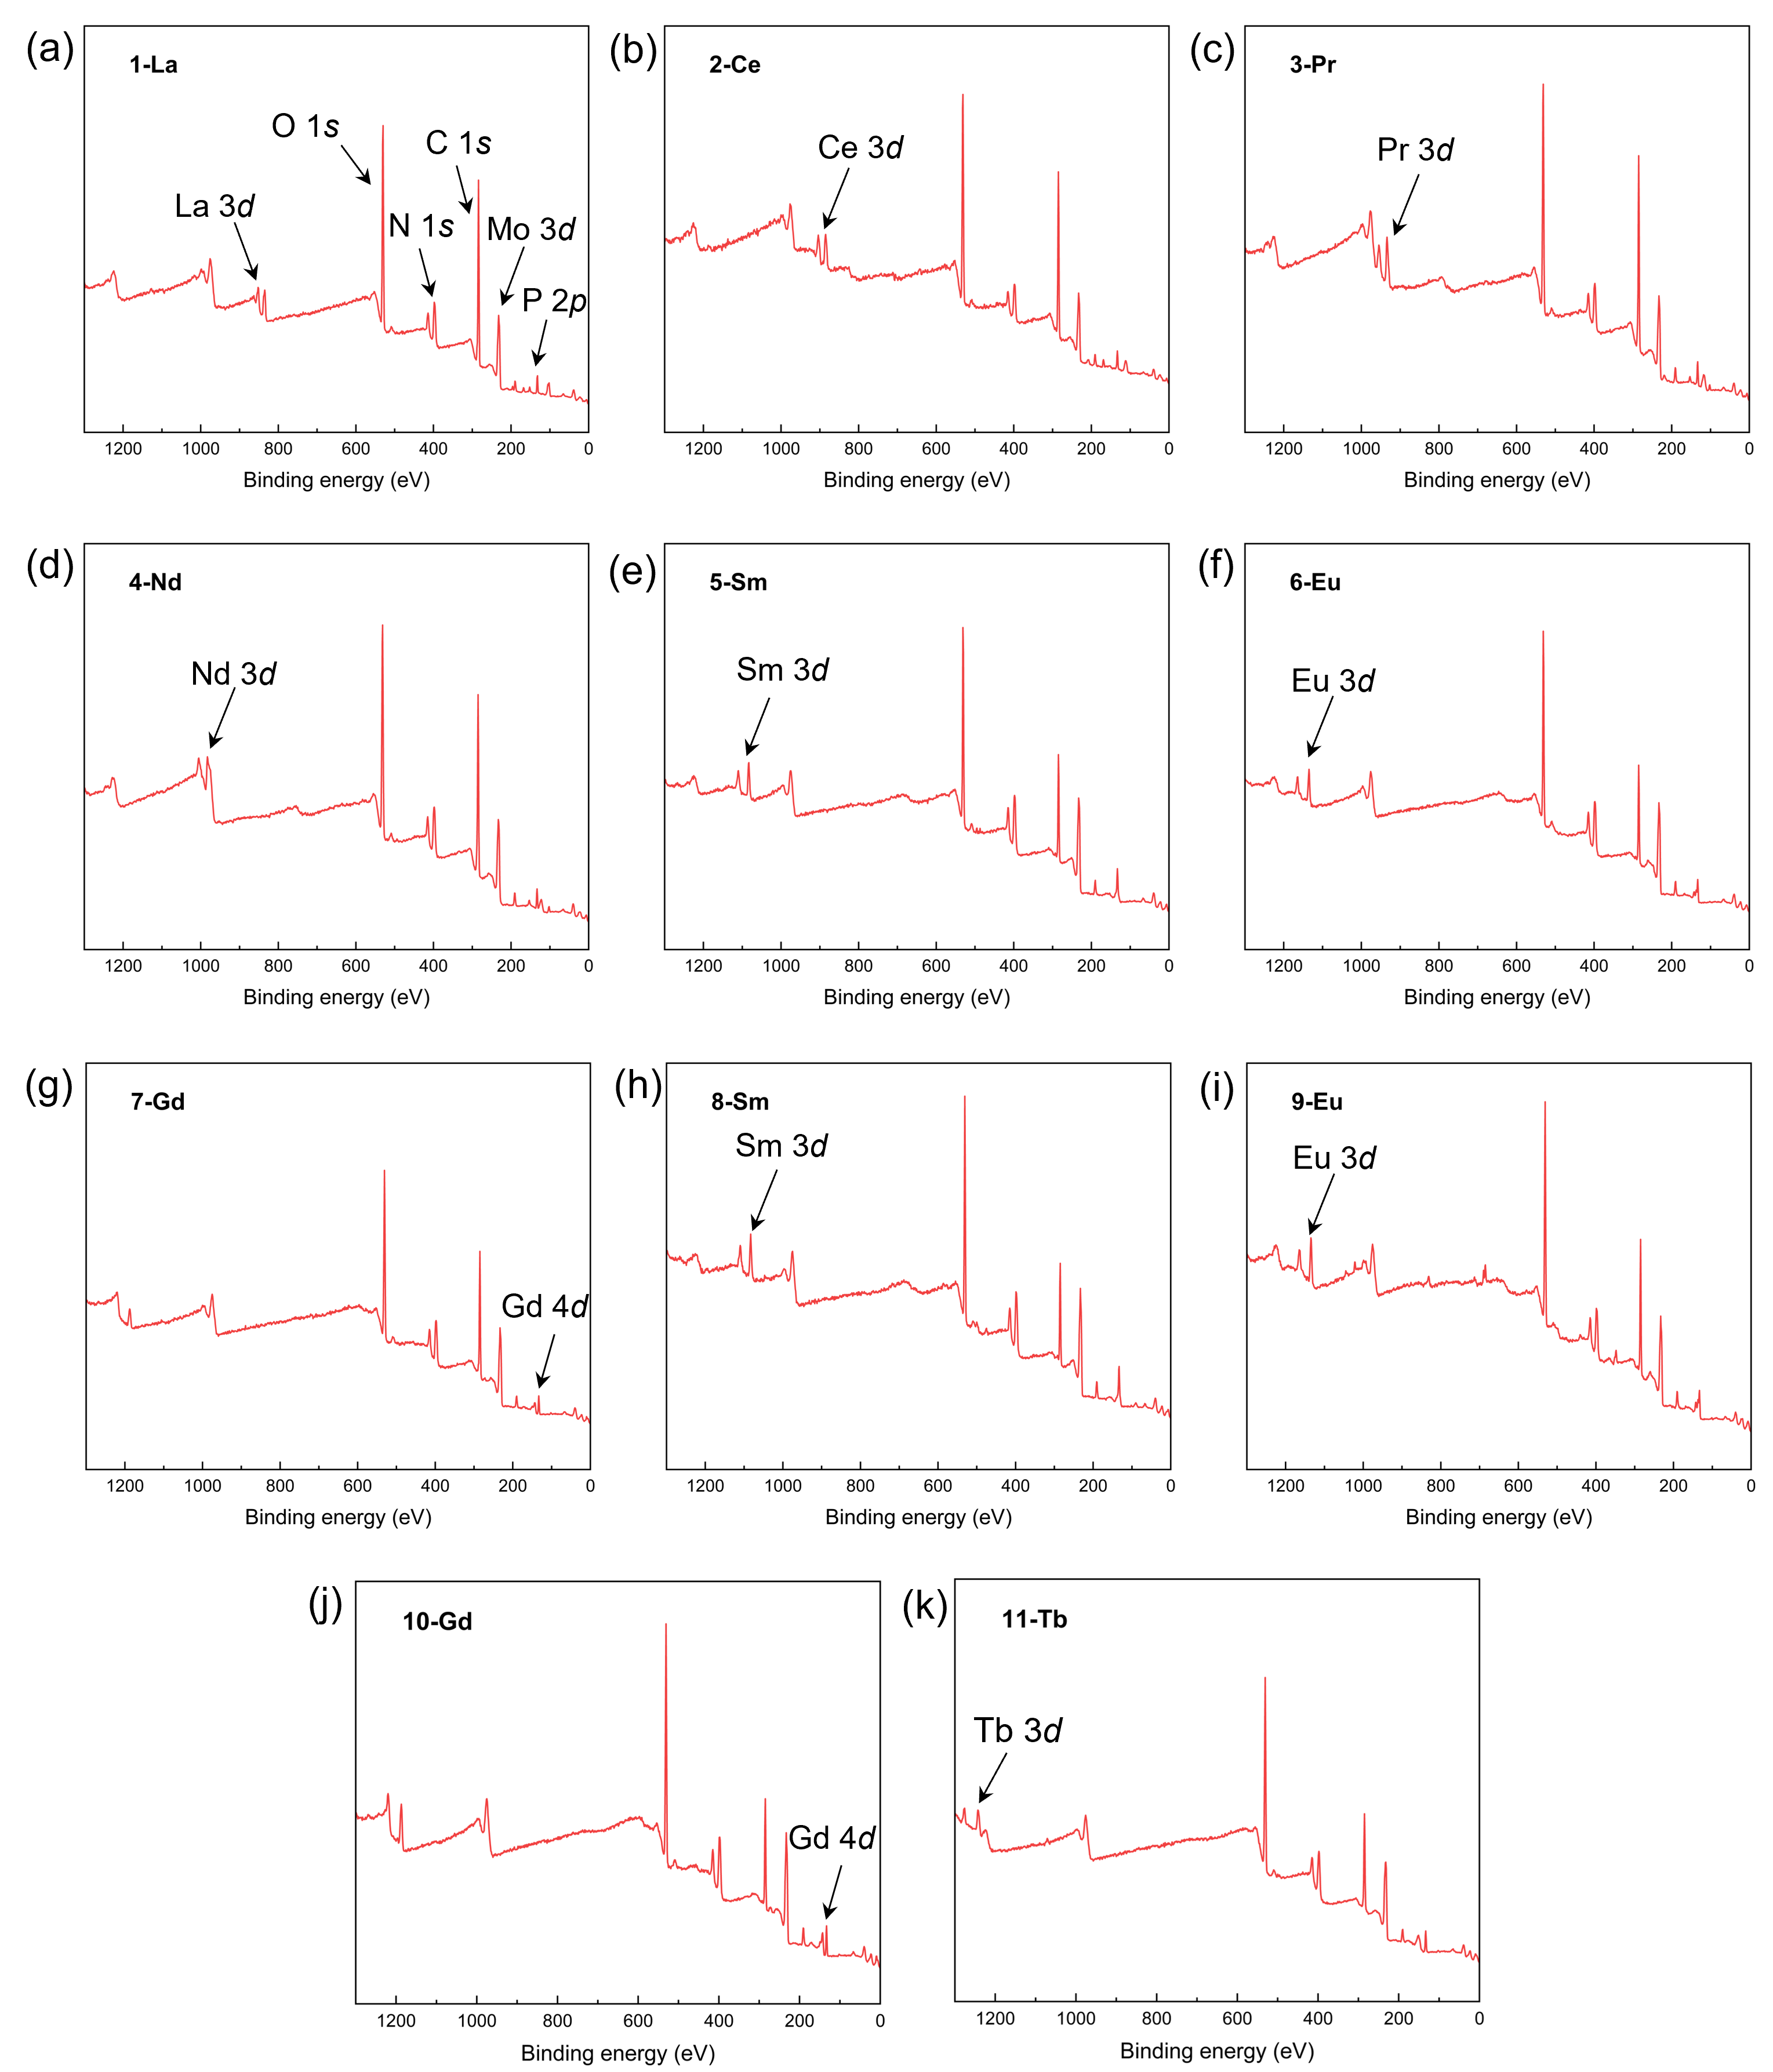
**

**Fig. S4.** Full XPS spectra and assigned species for {Ln2(MoIV3)} clusters **1**–**11**

**
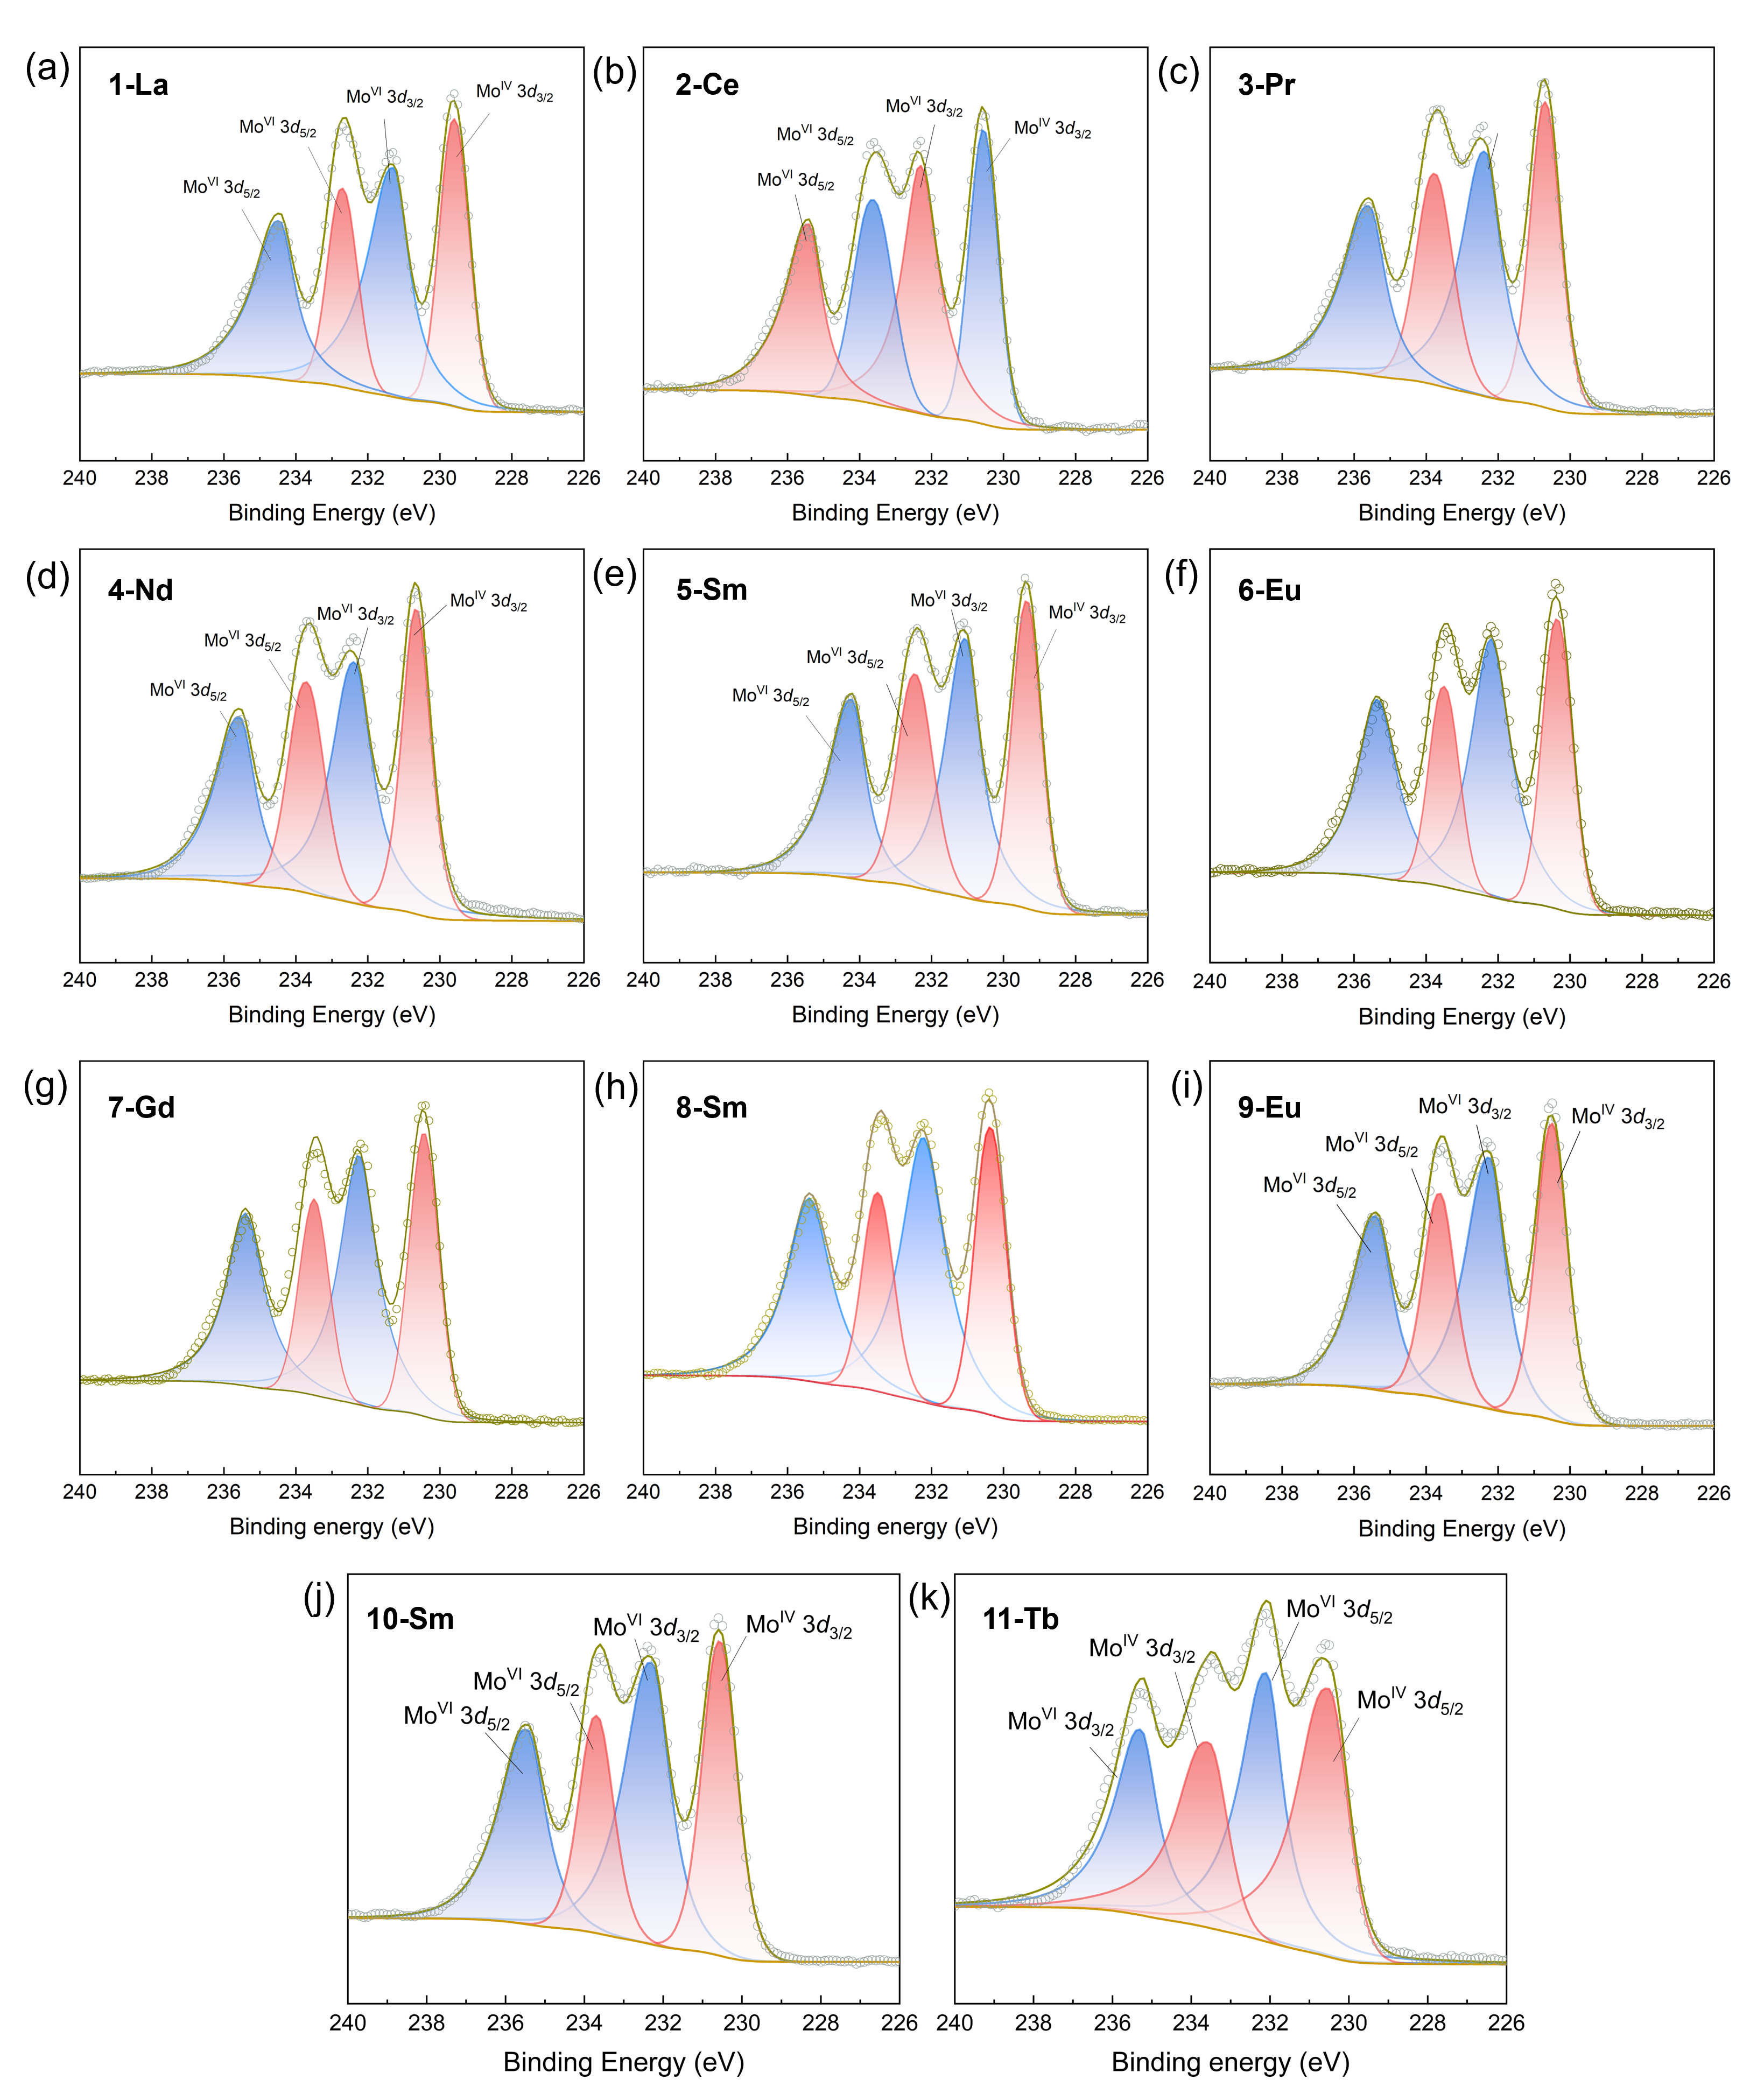
**

**Fig. S5.** Mo 3*d* XPS spectra showing species assignment for {Ln2(MoIV3)} clusters **1**–**11**


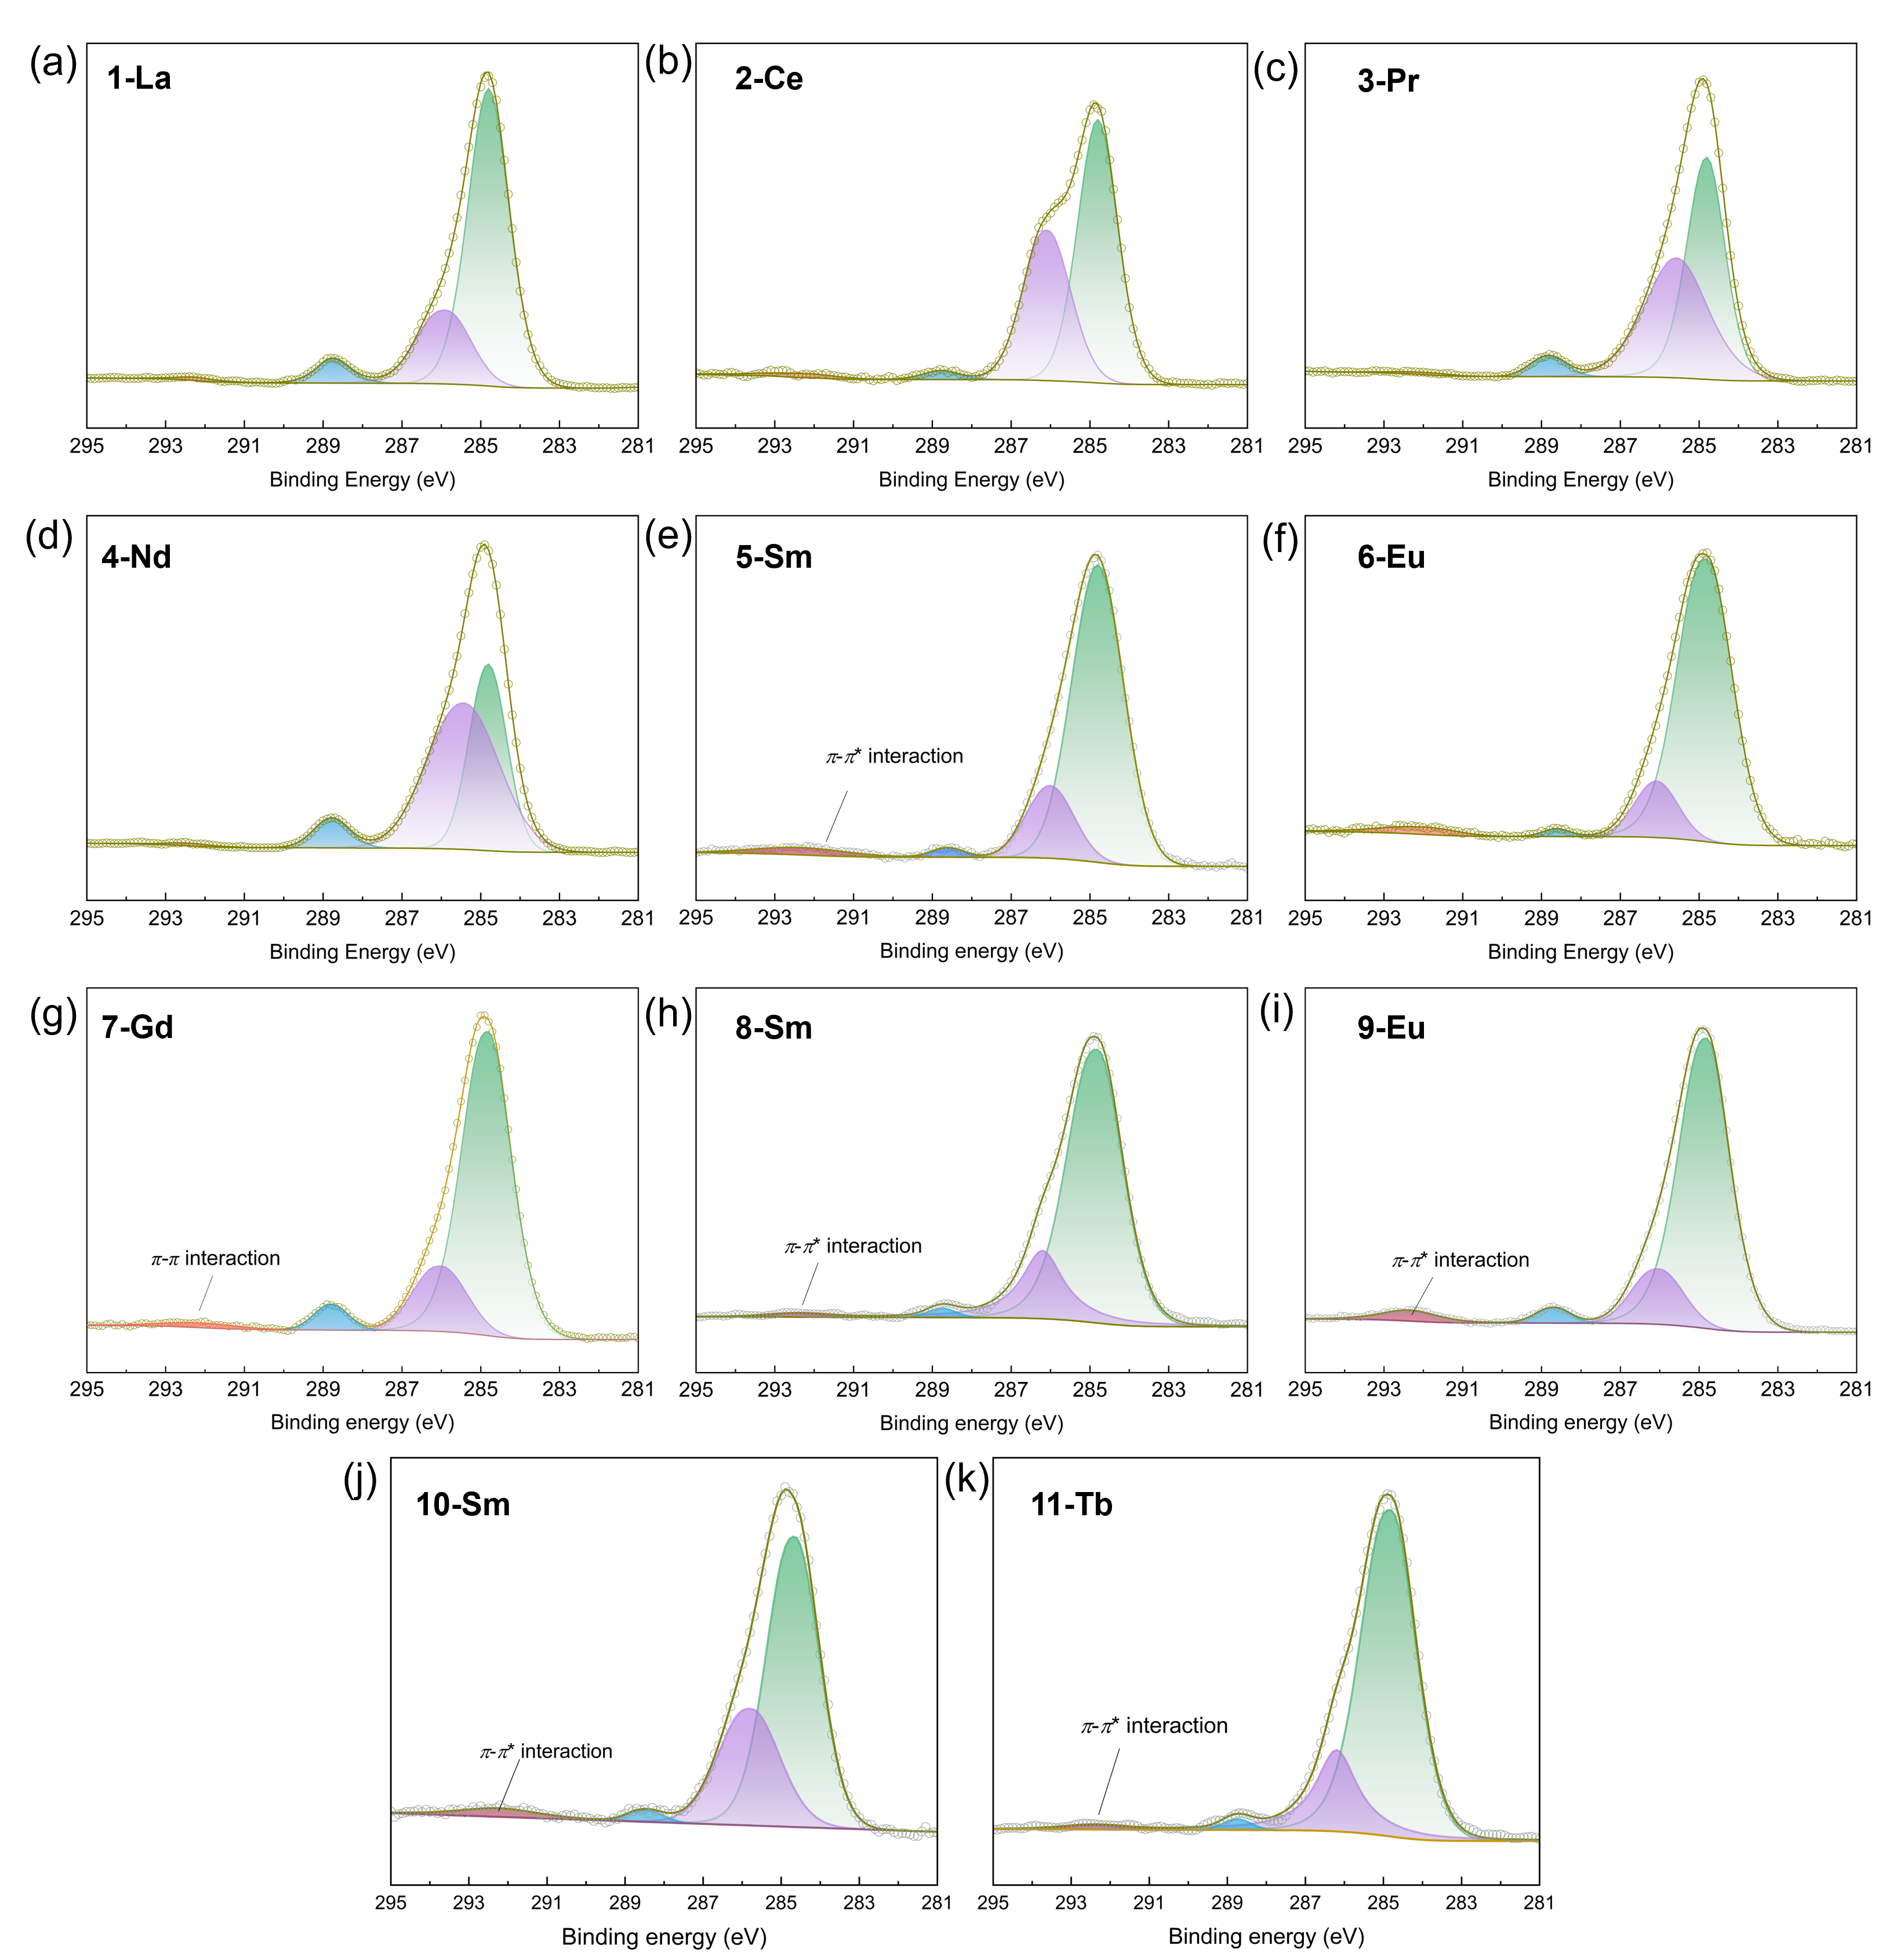


**Fig. S6.** C 1*s* XPS spectra showing species assignment for {Ln2(MoIV3)} clusters **1**–**11**


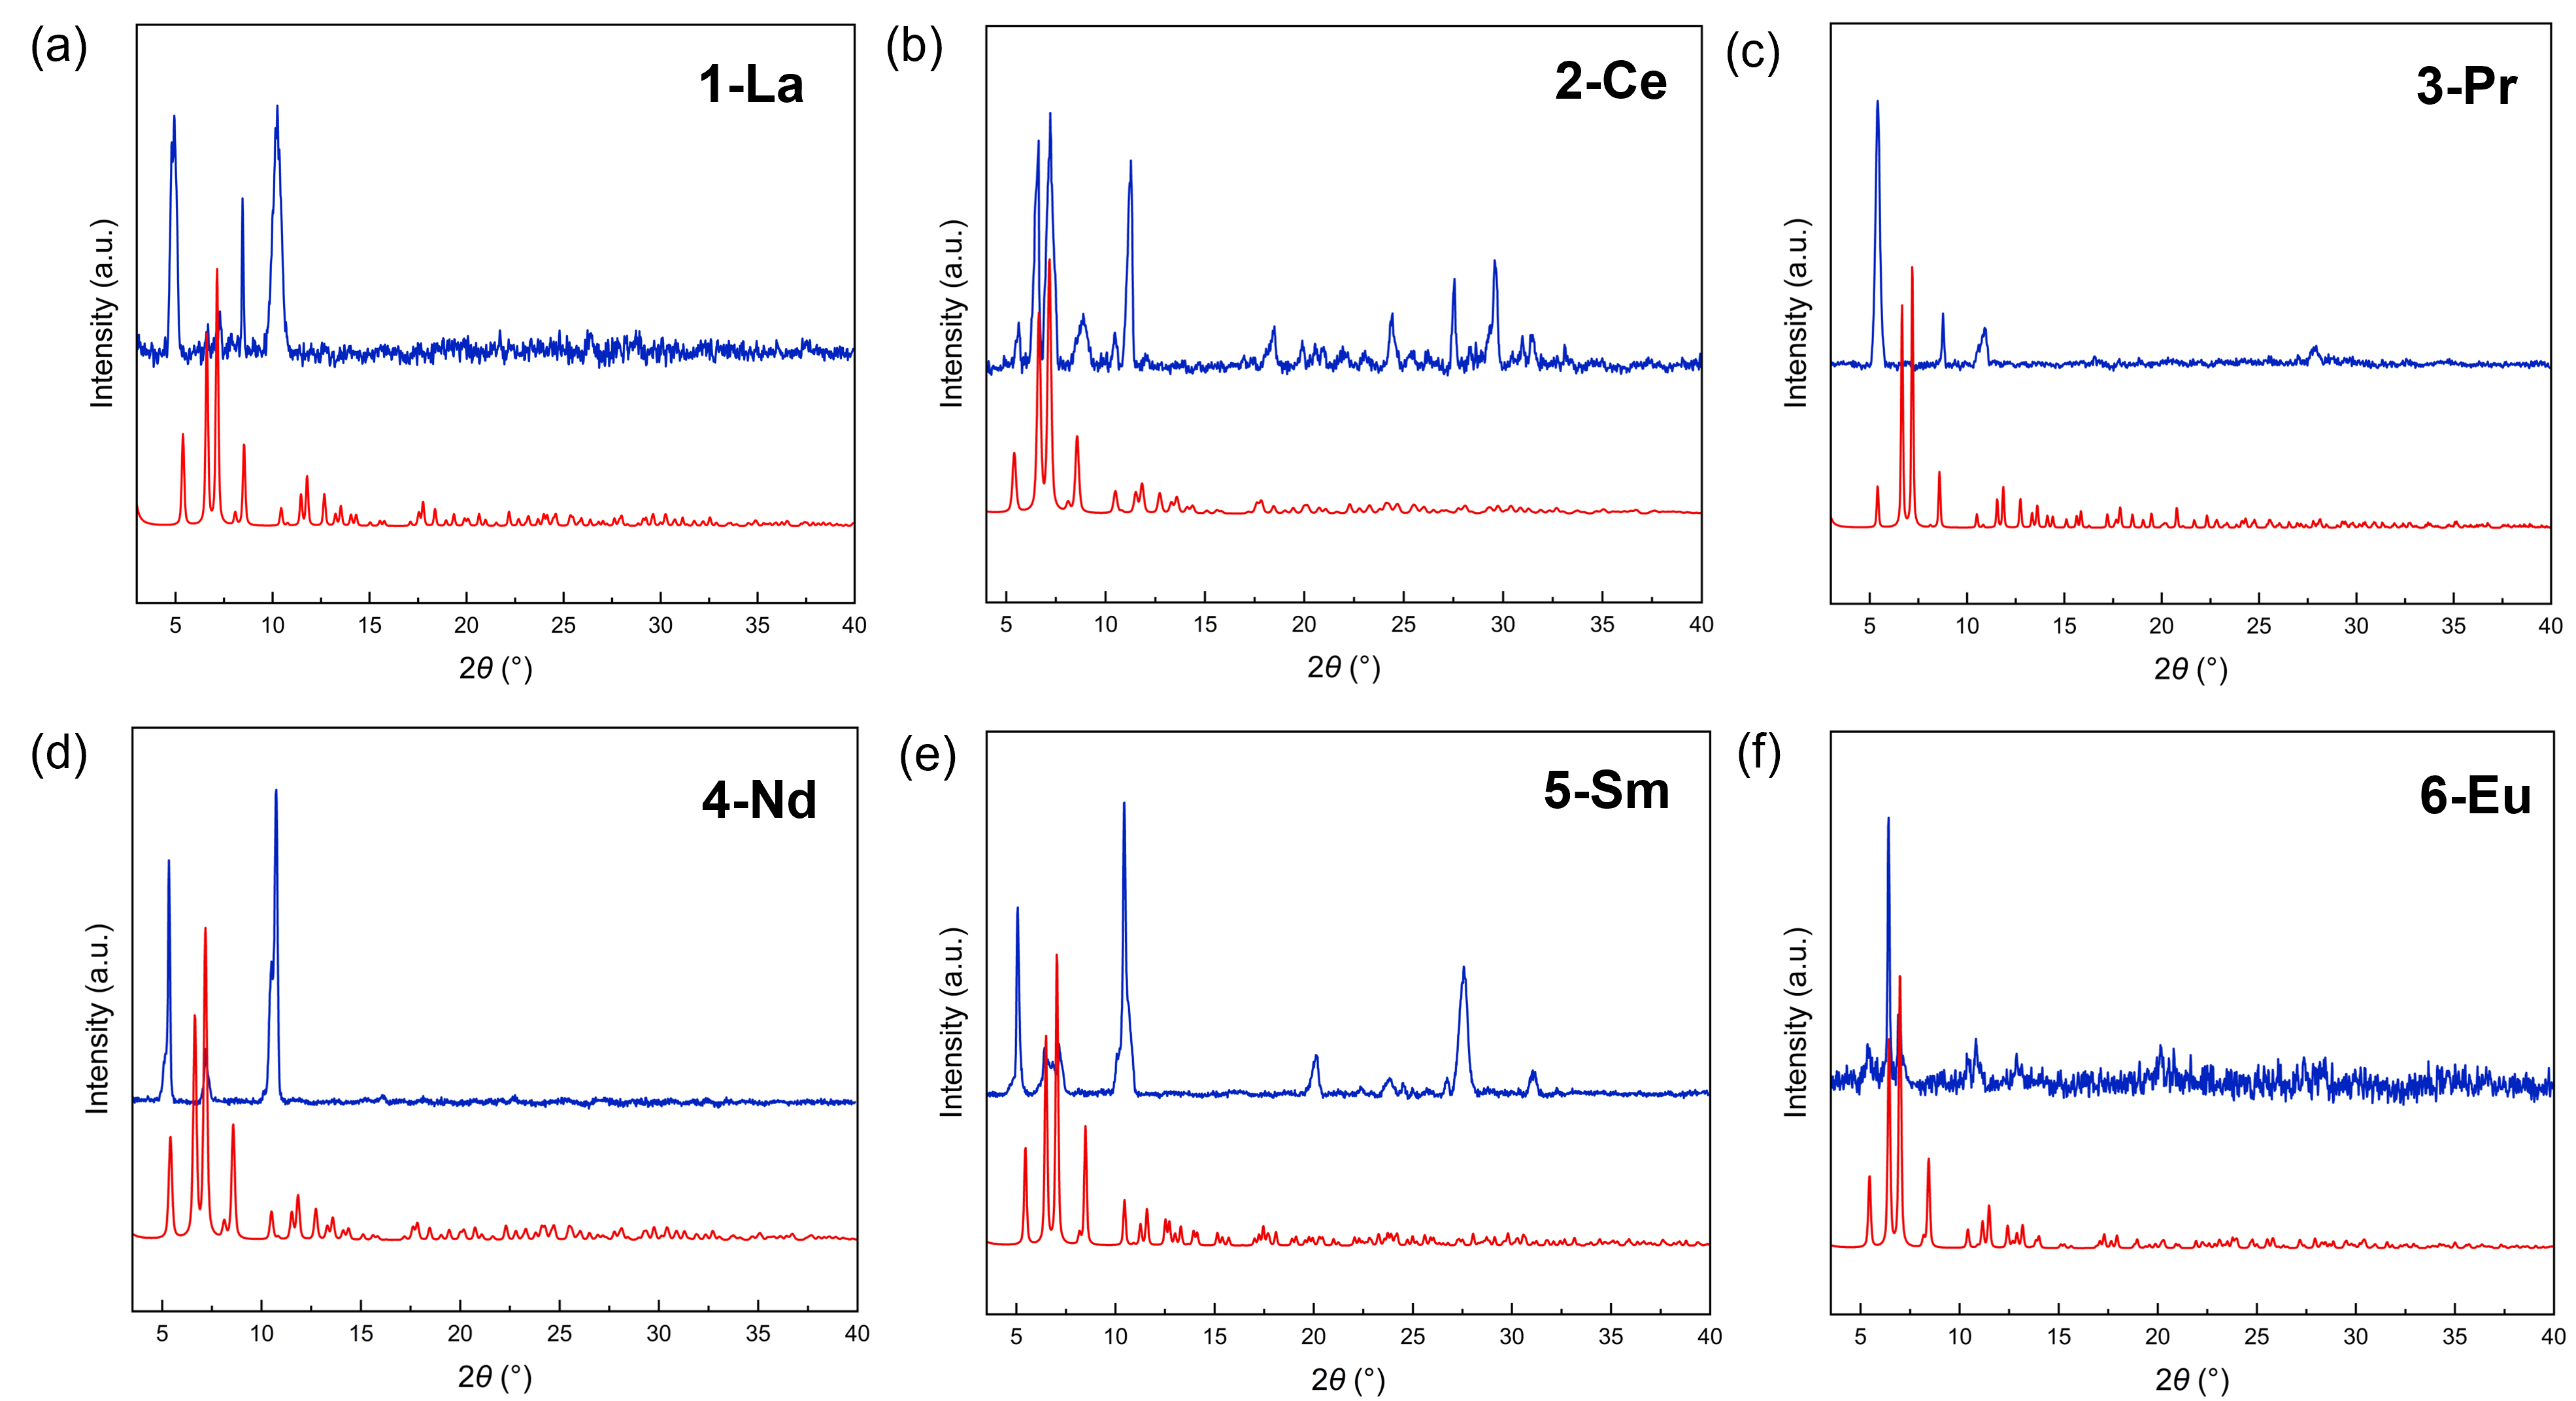

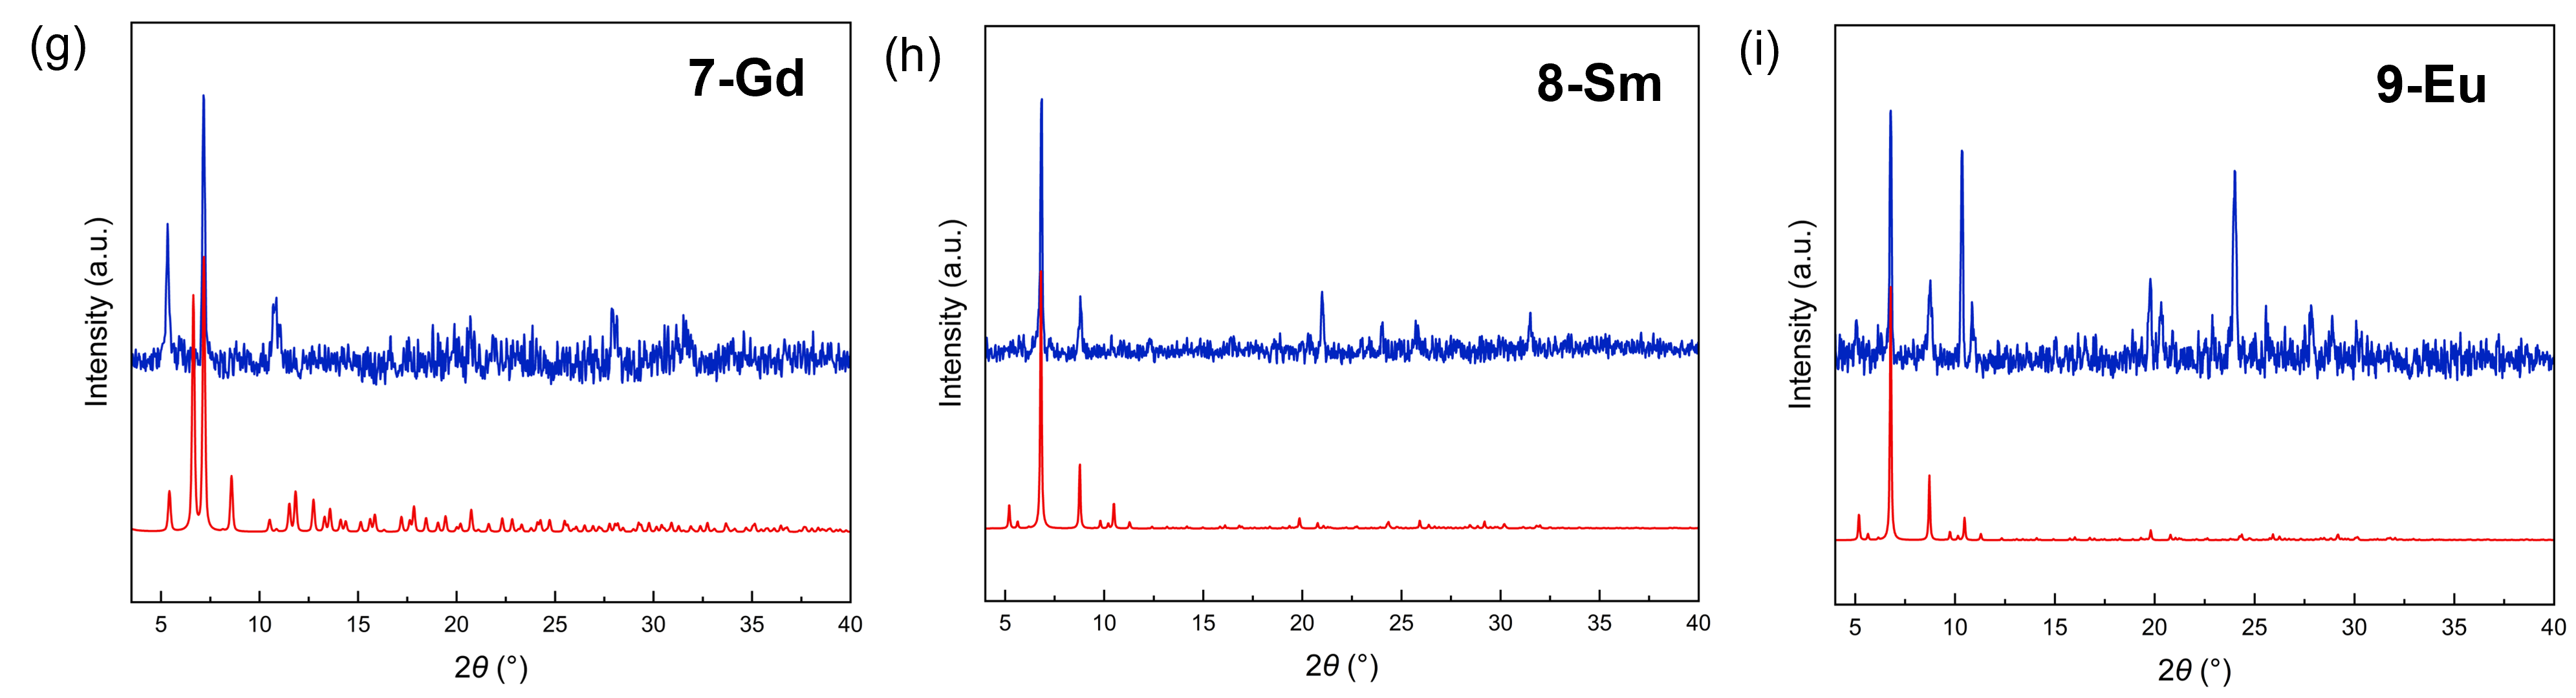


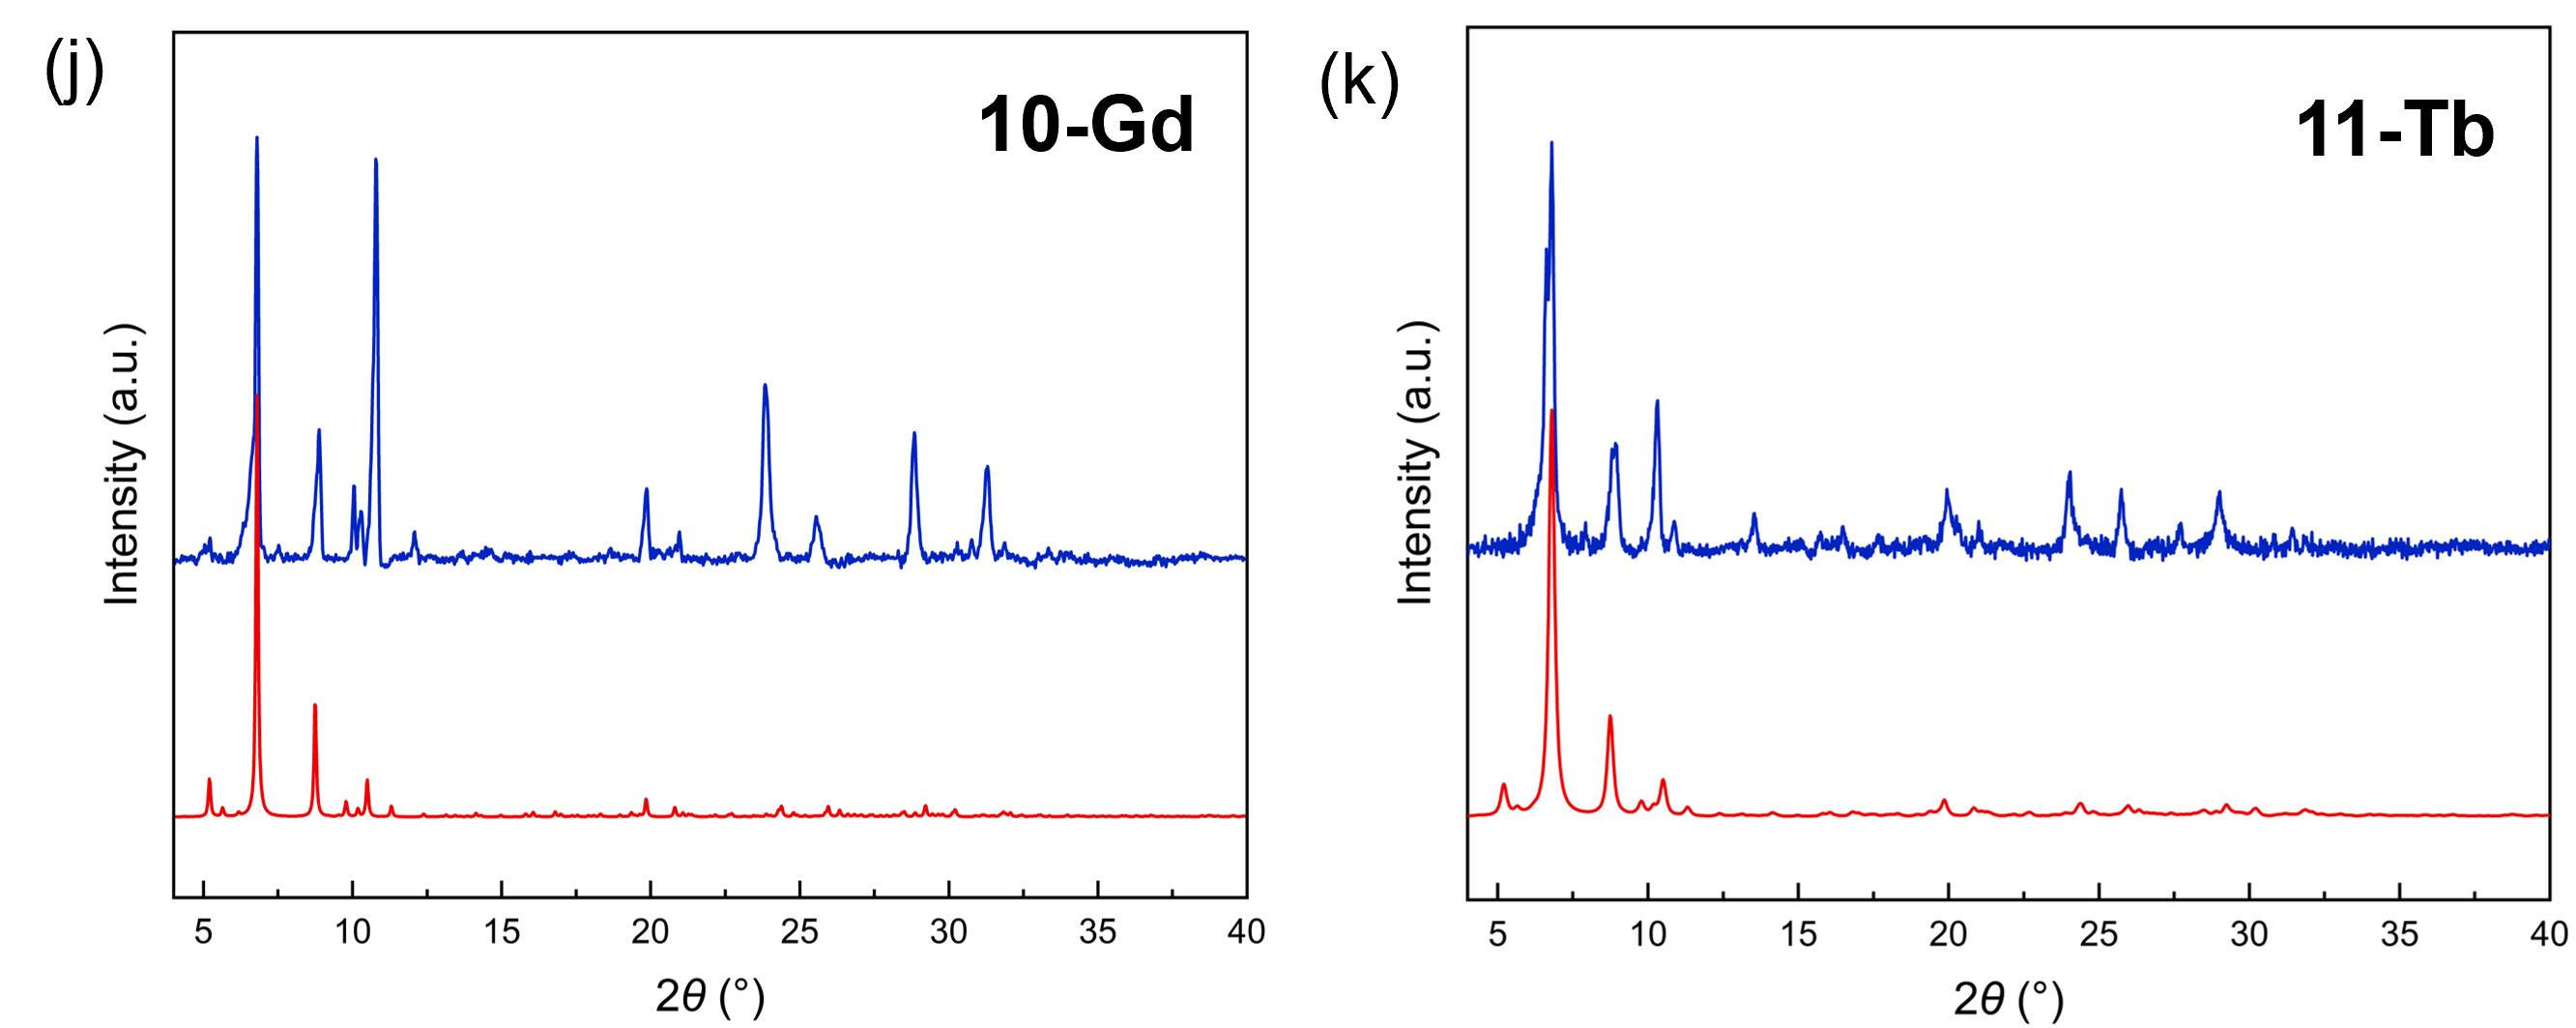


**Fig. S7.** The experimental and simulated PXRD patterns for {Ln2(MoIV3)} clusters **1**–**11**

**
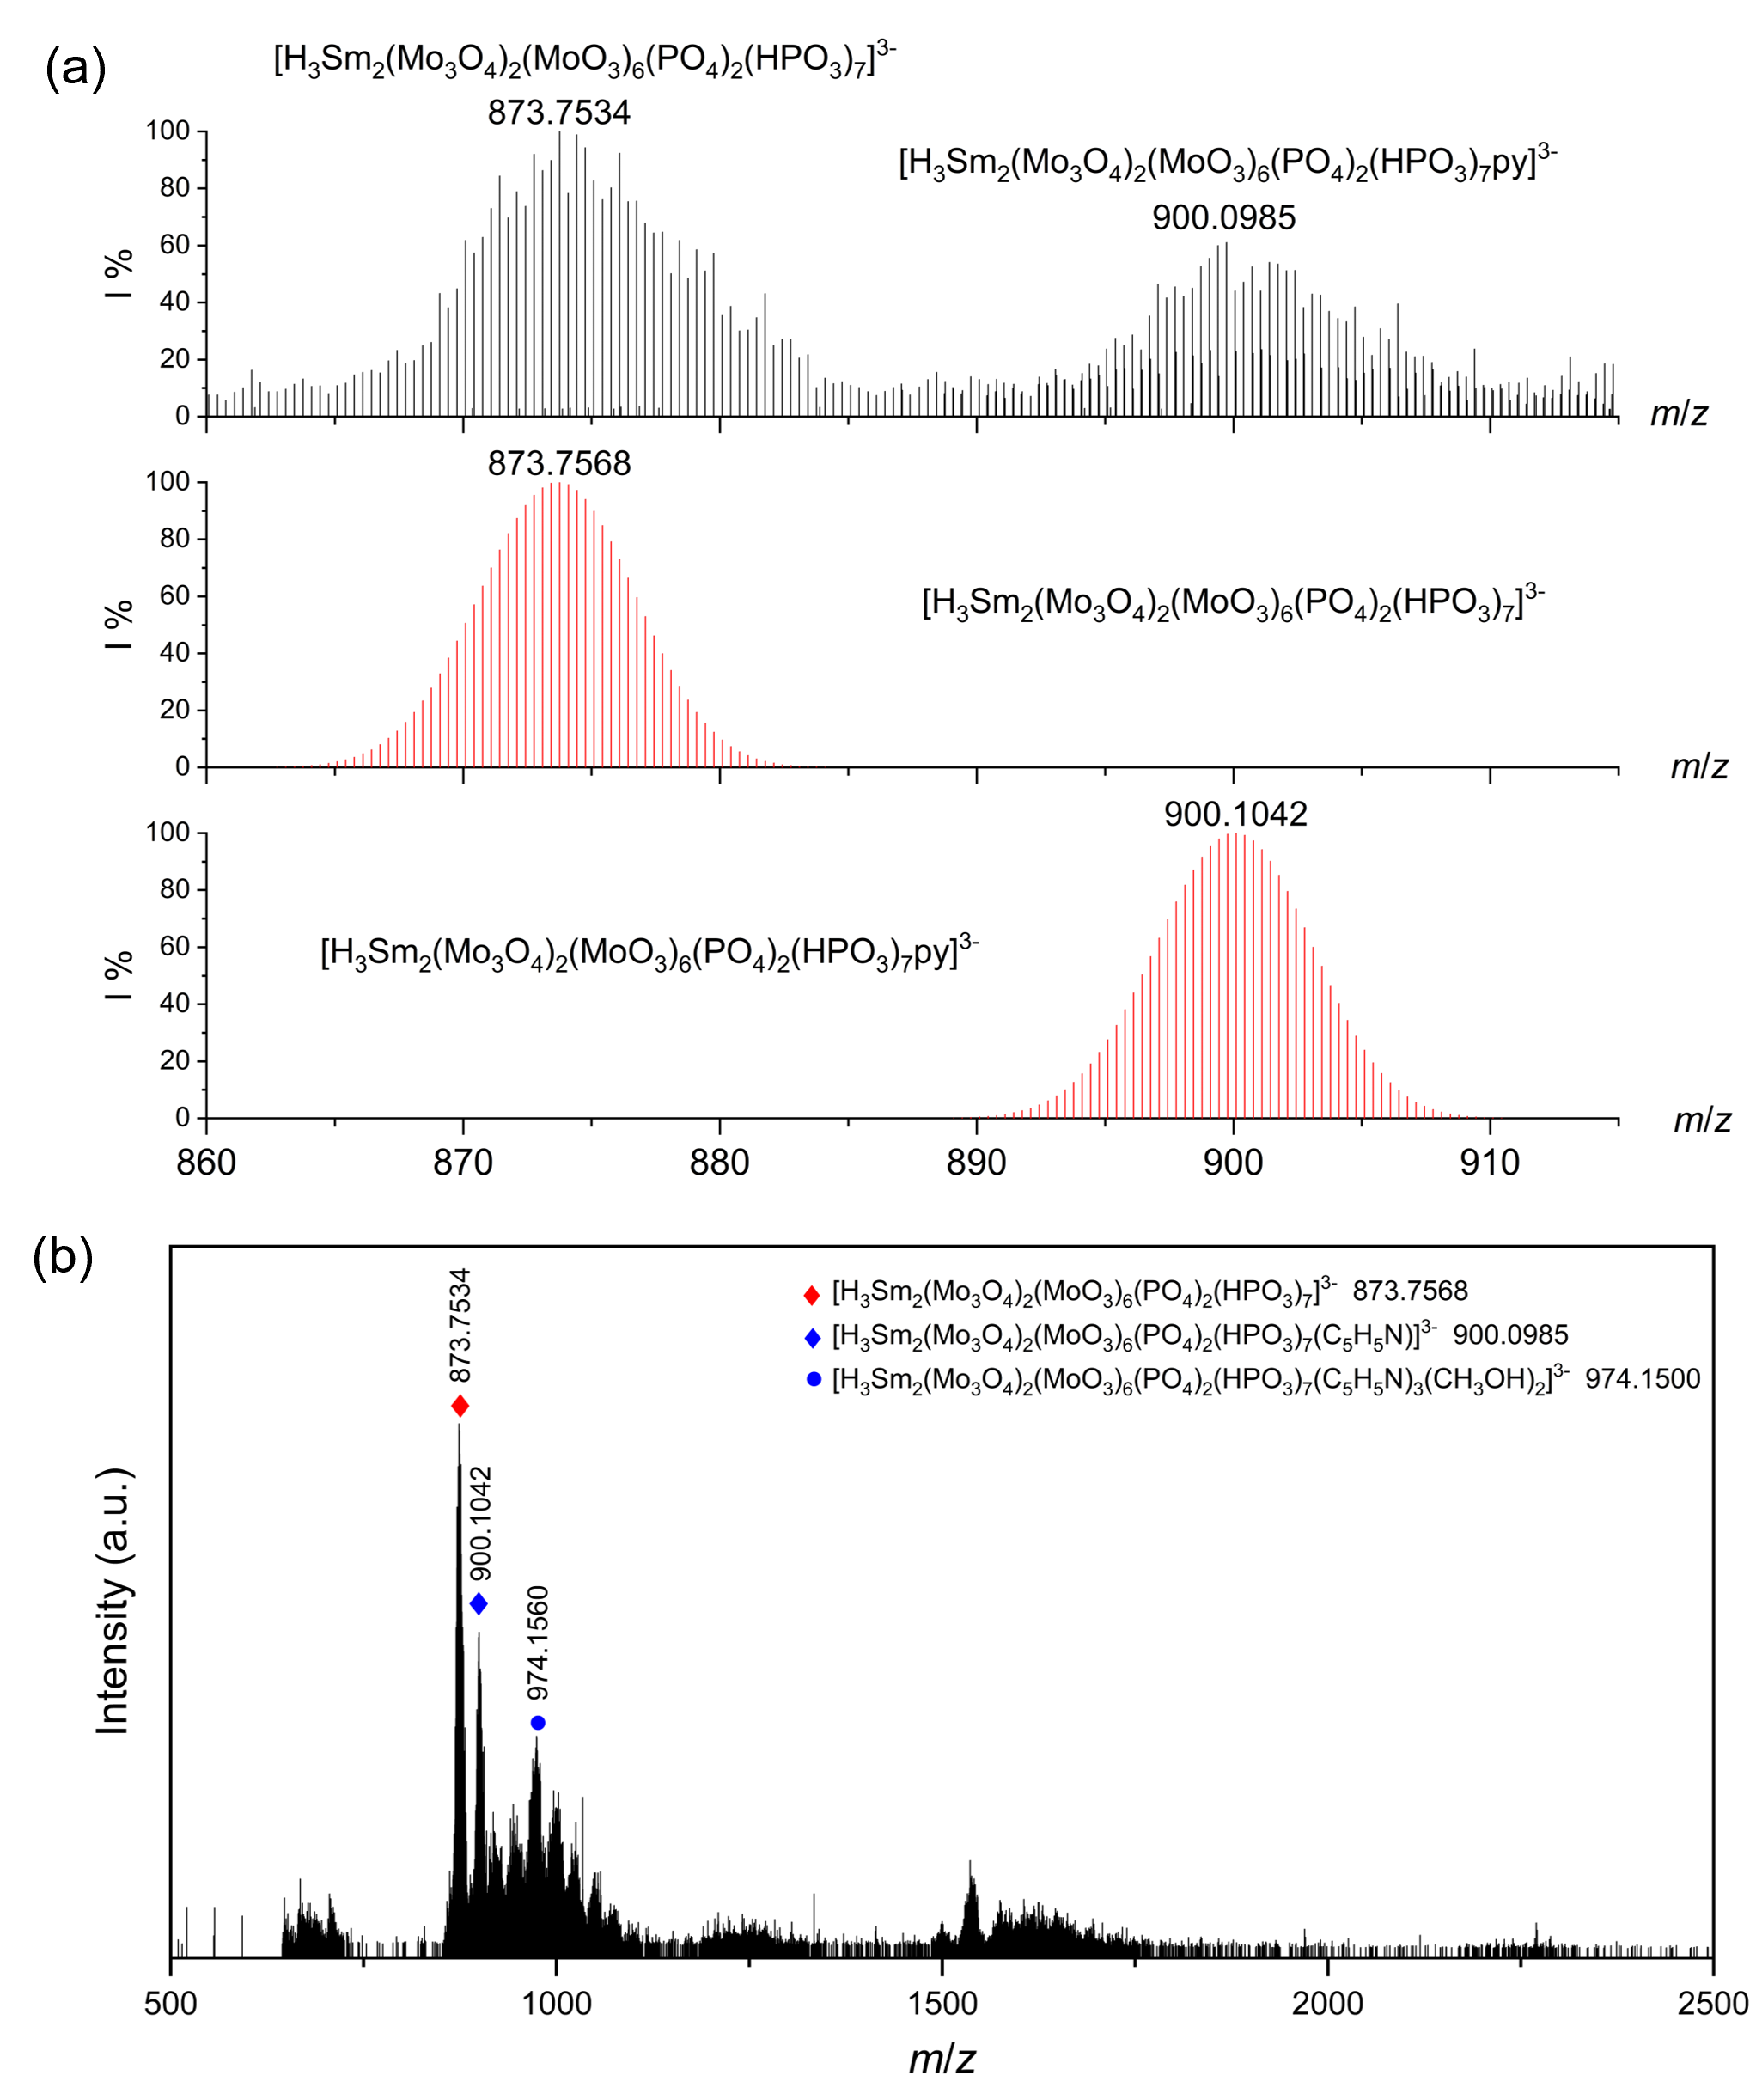
**

**
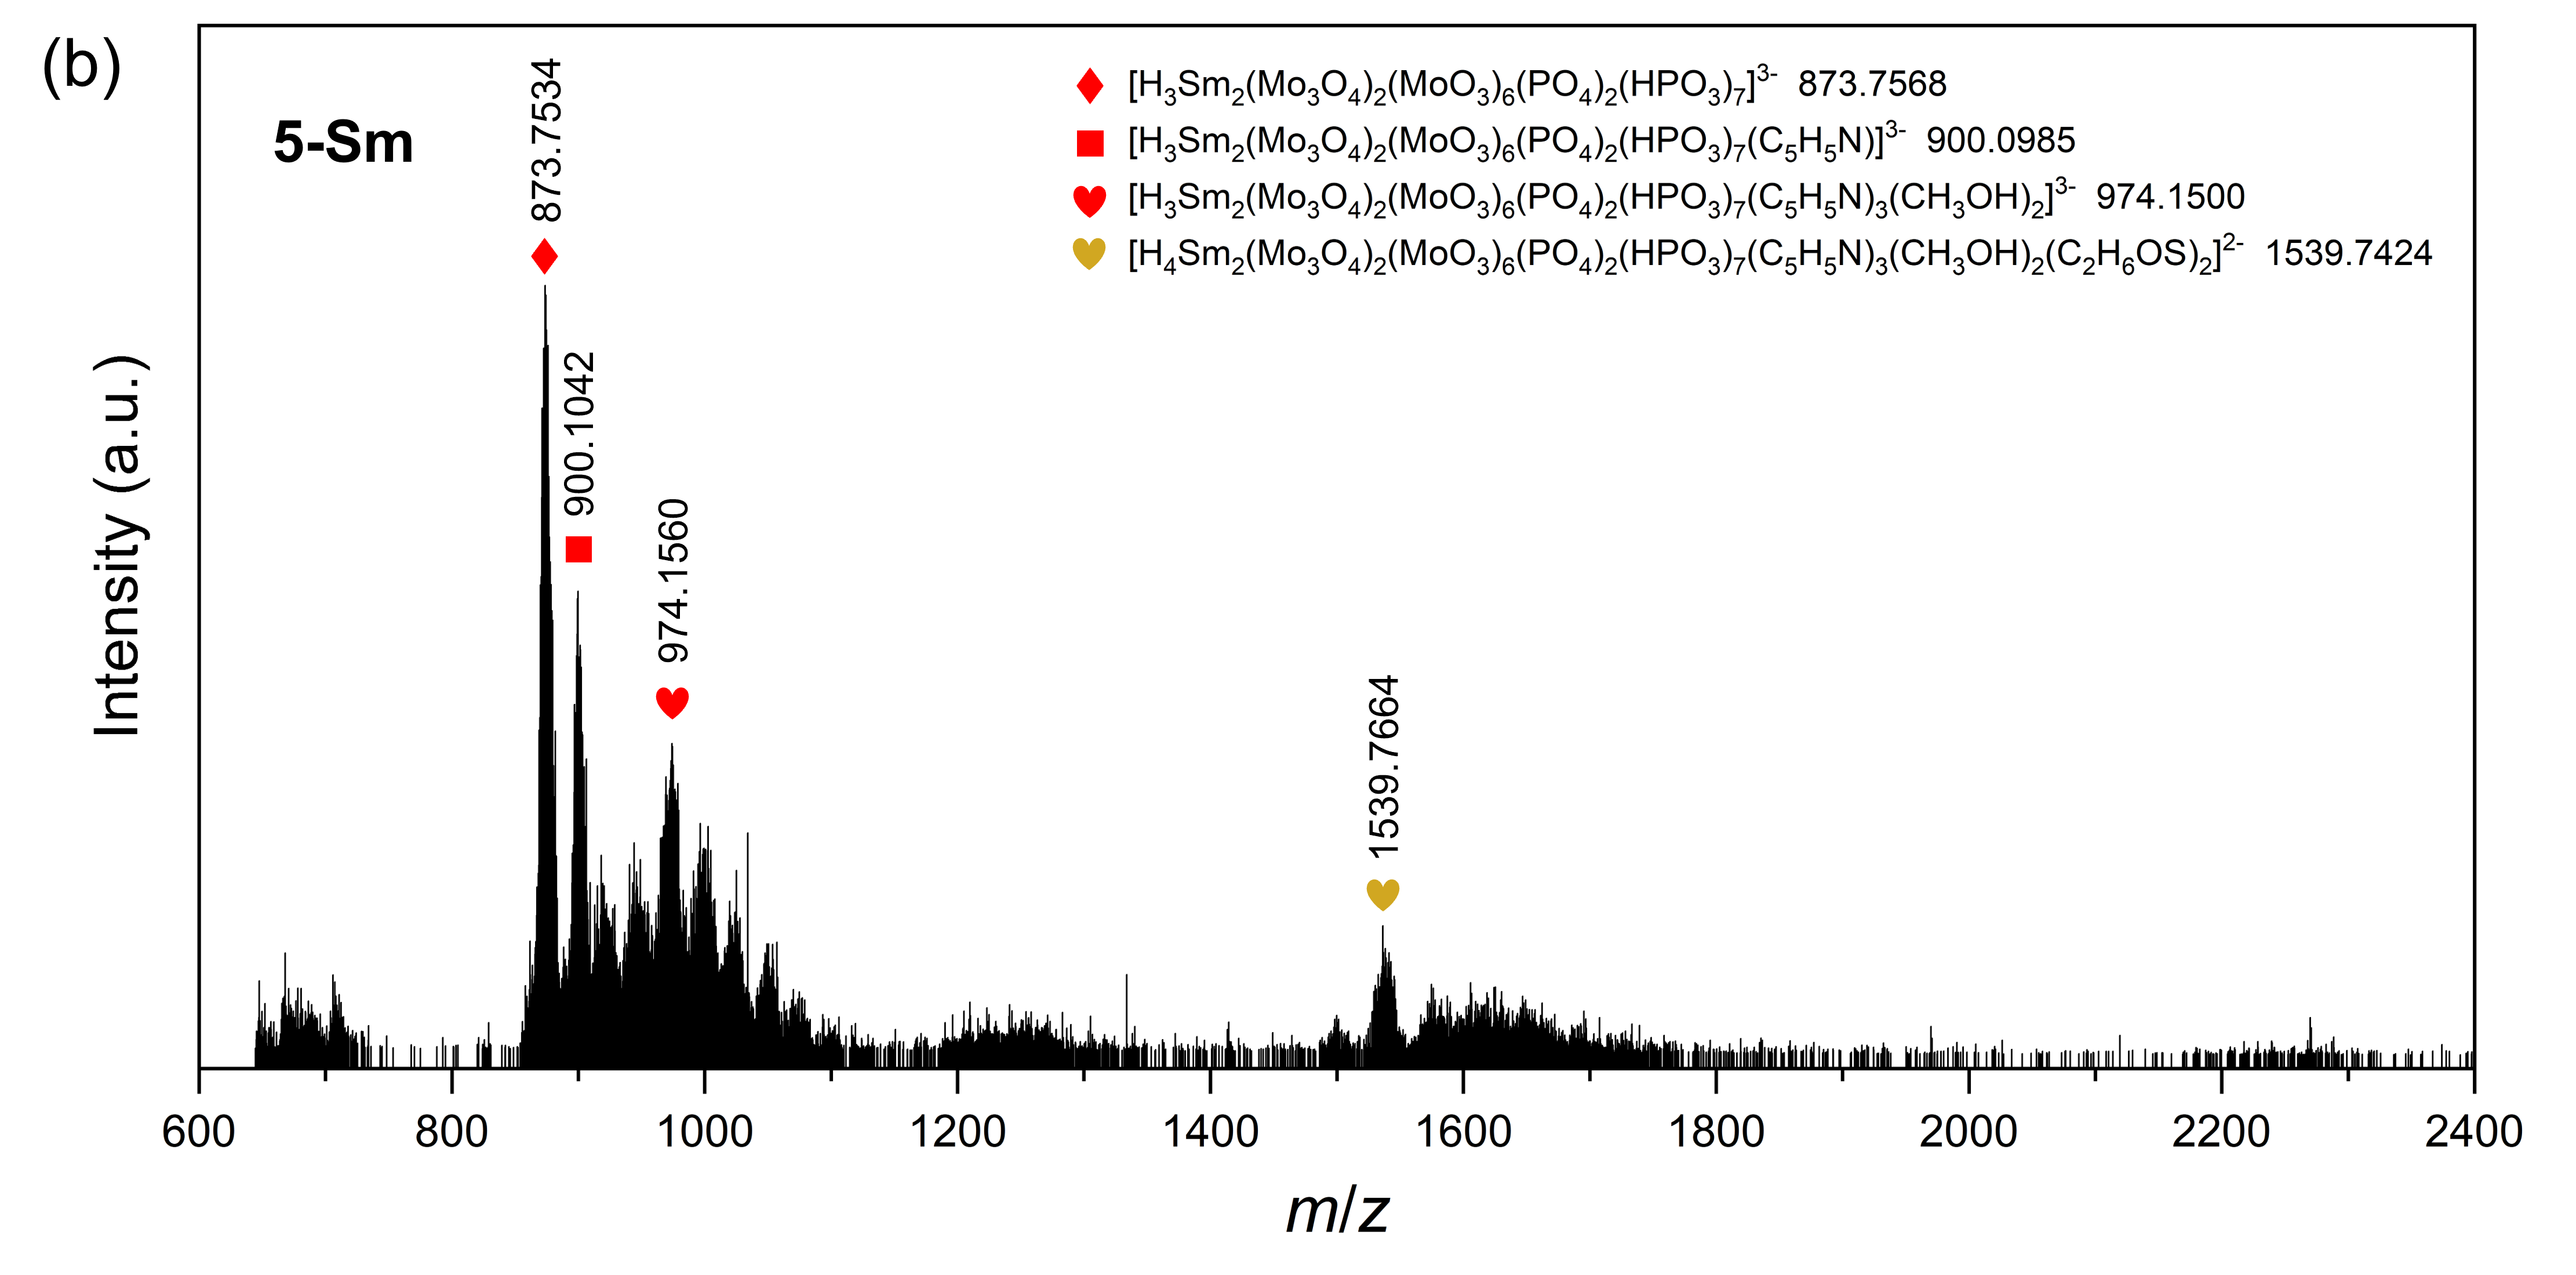
**


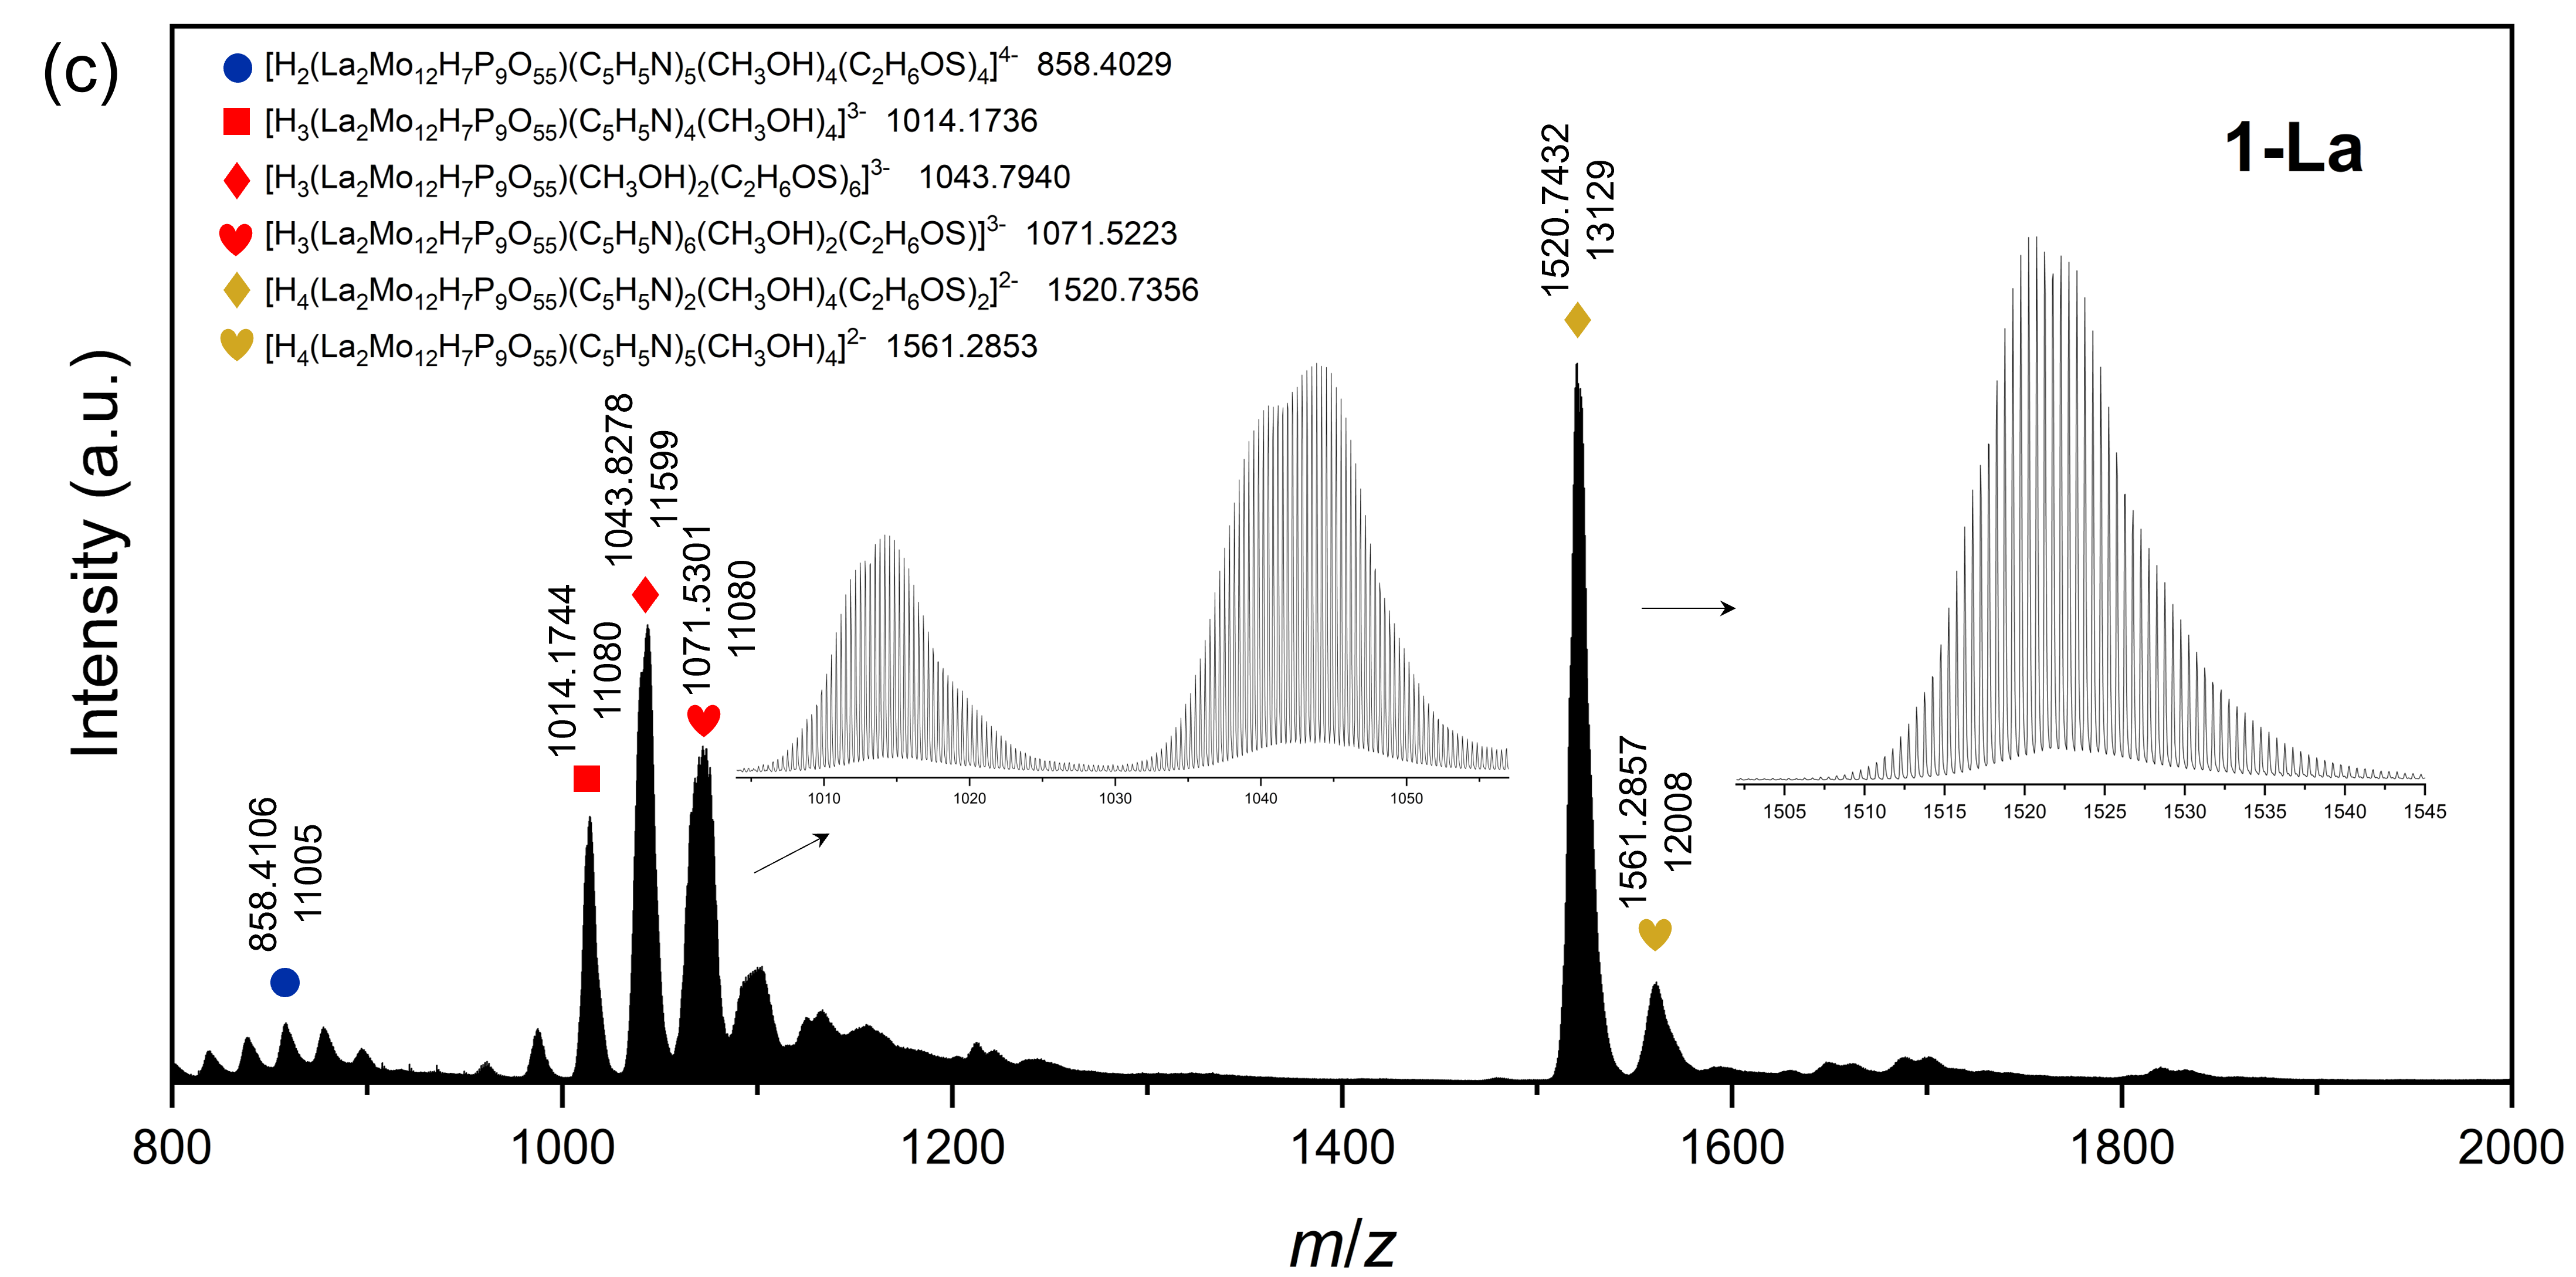


**
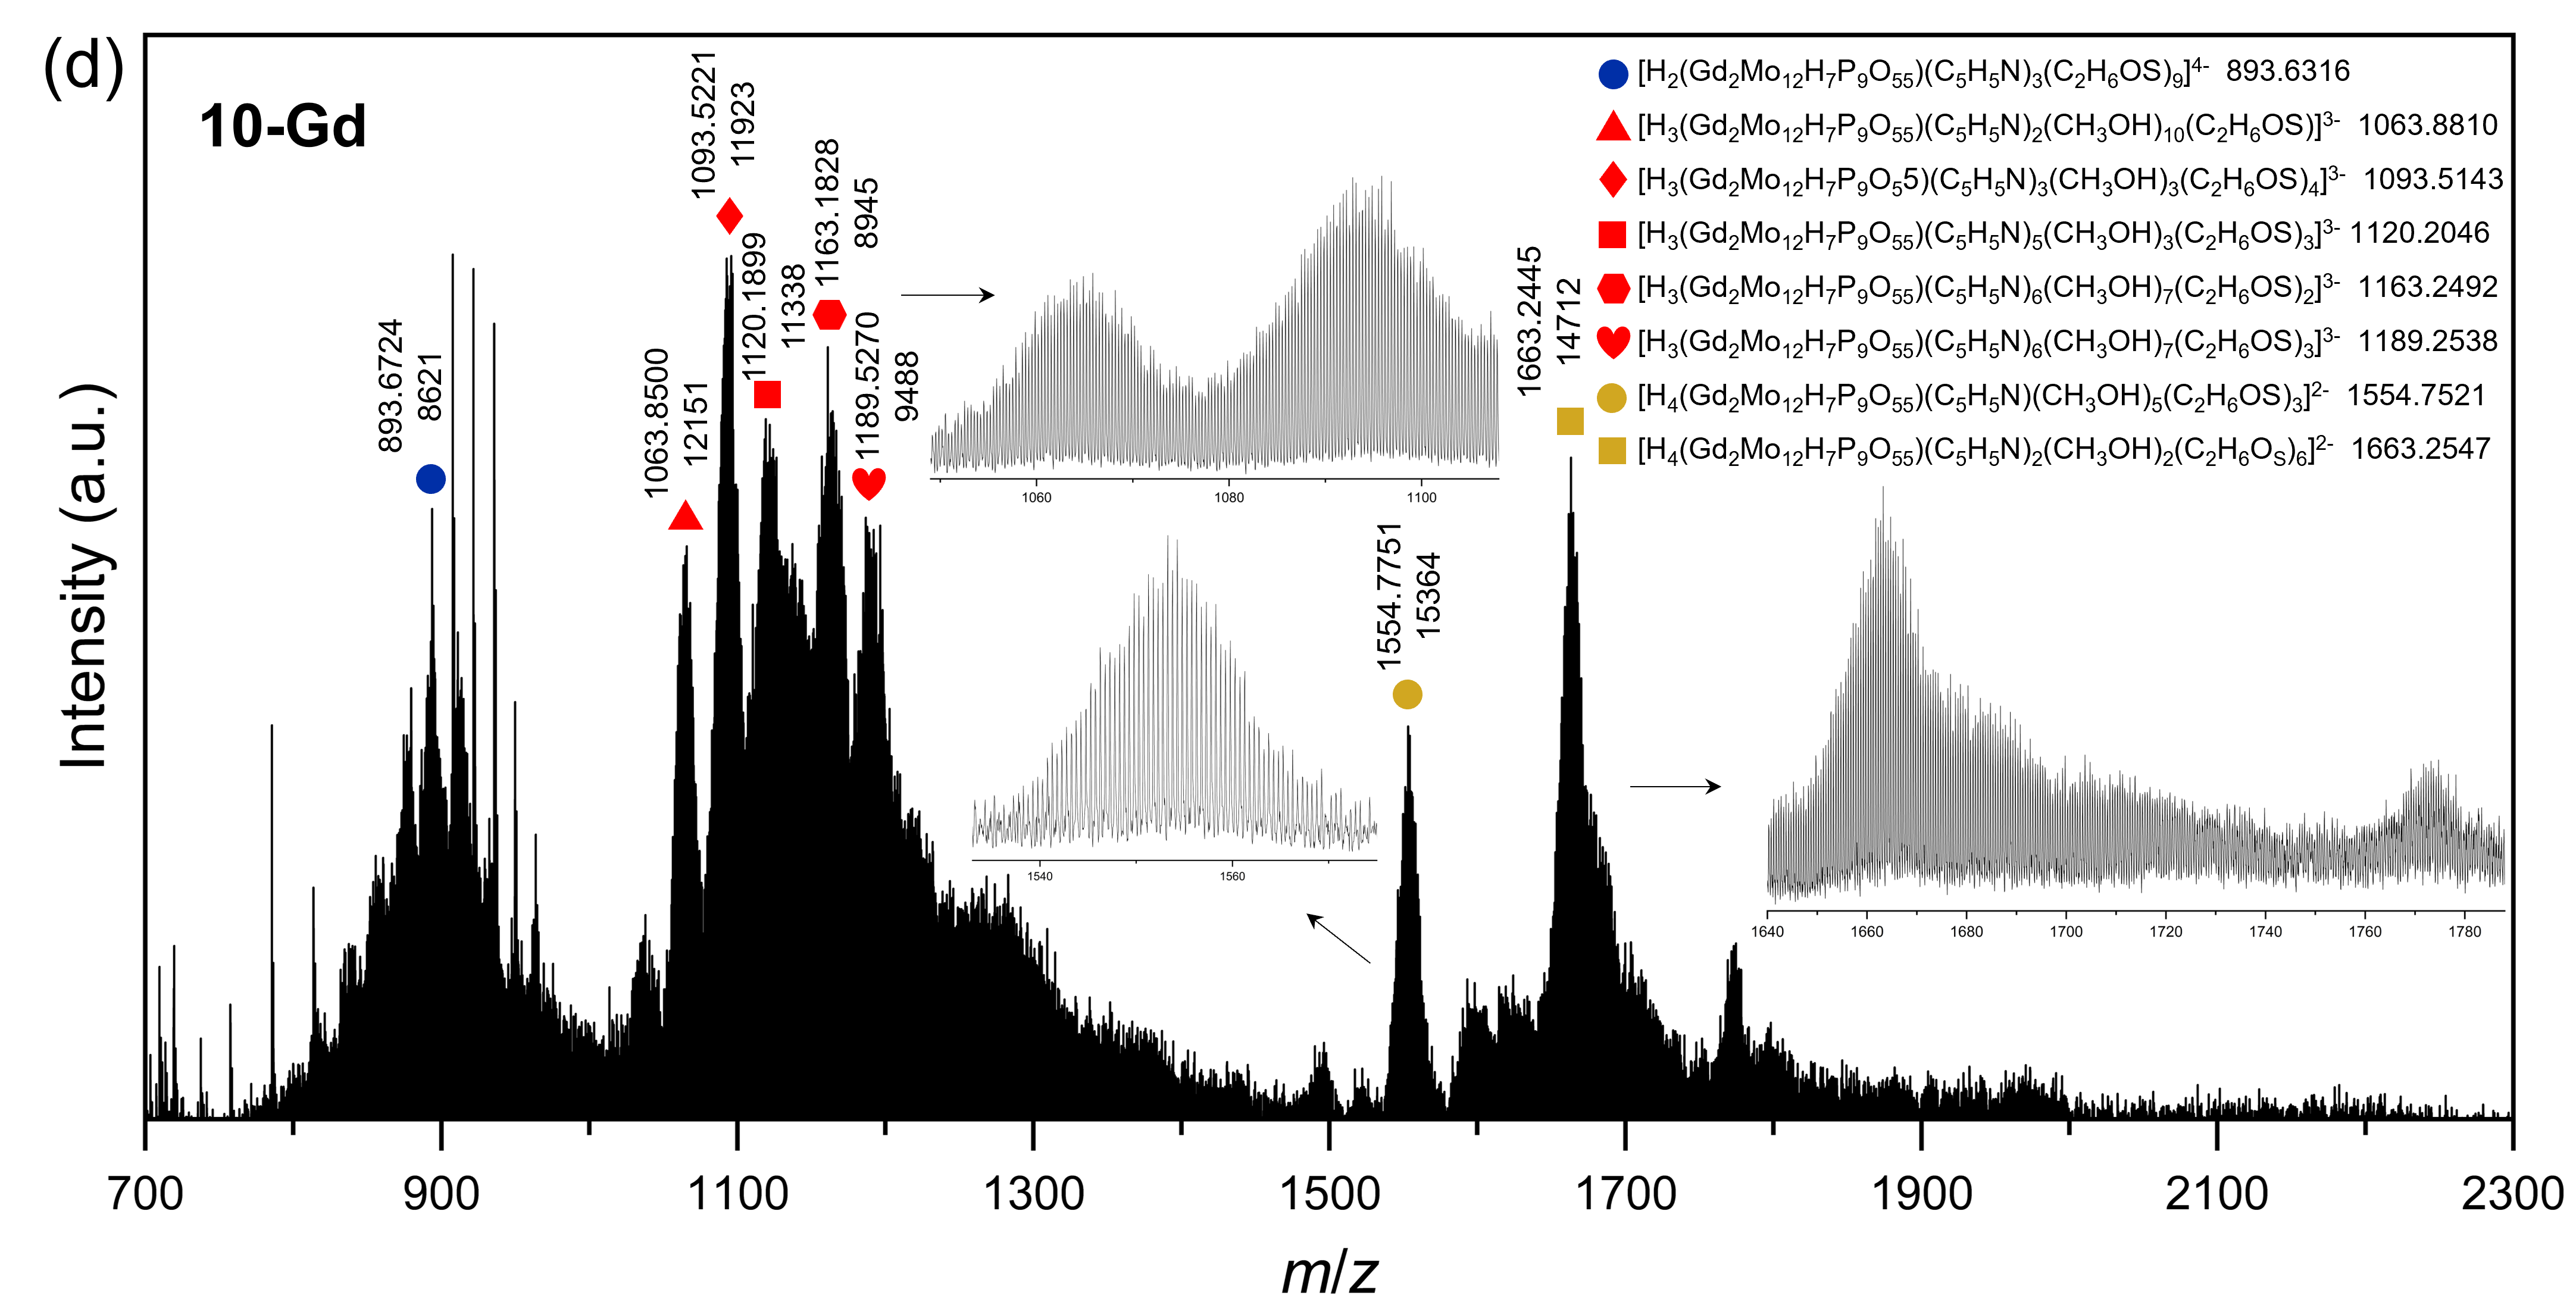
**

**
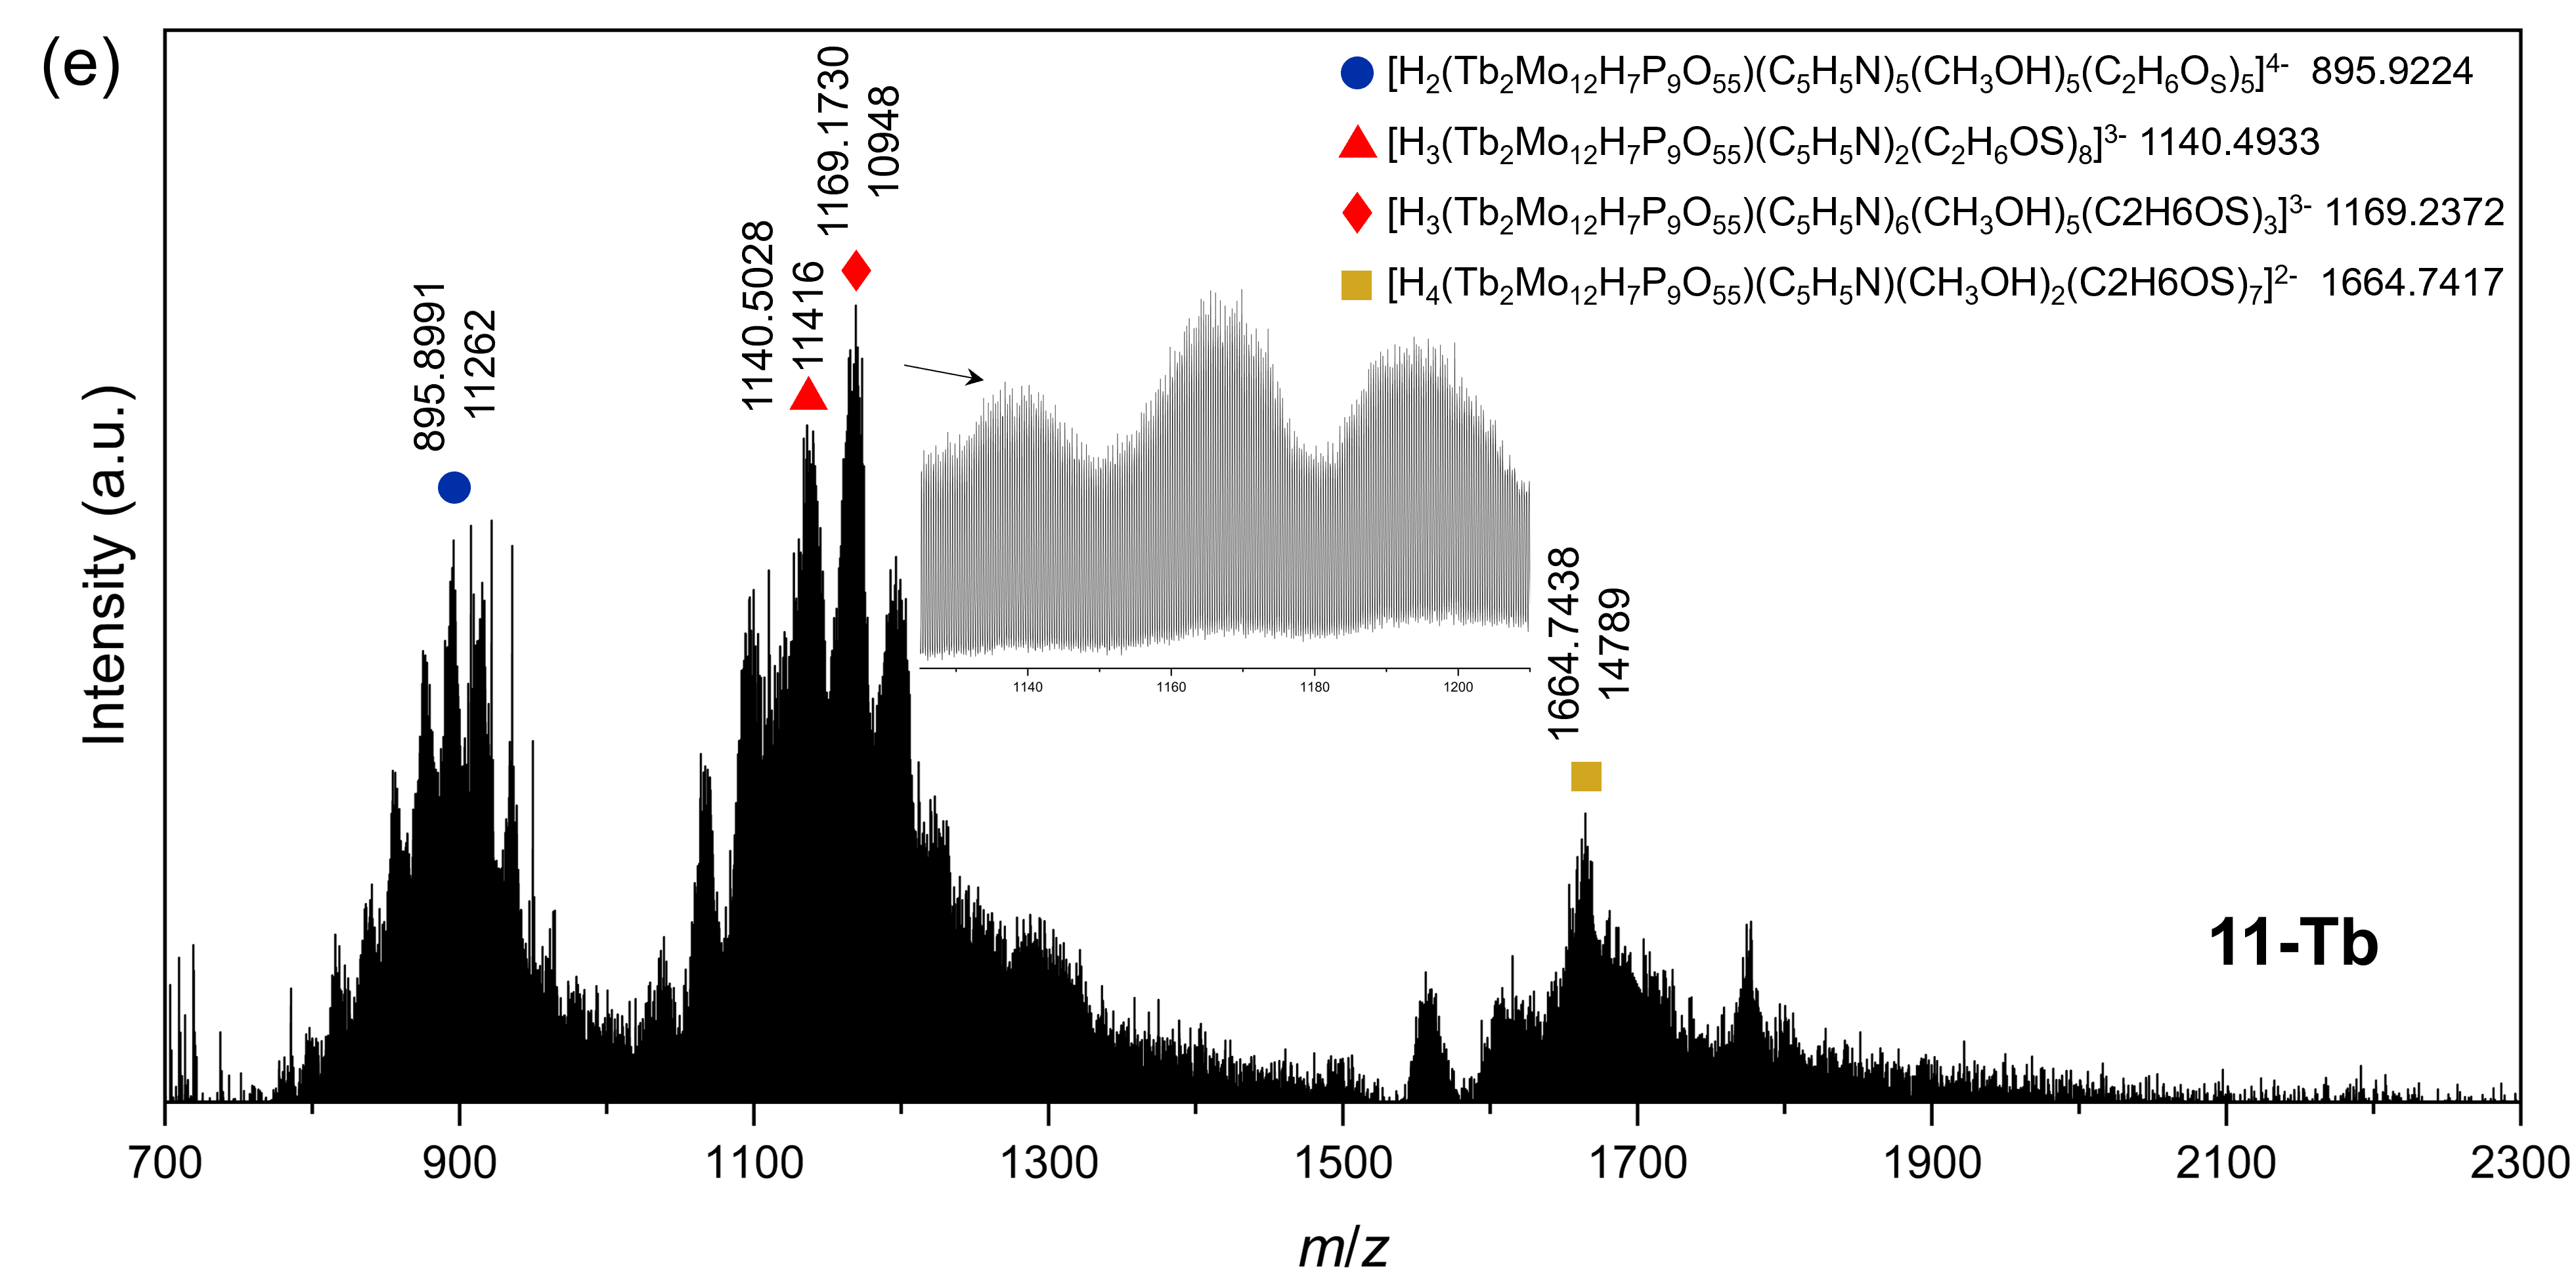
**

**Fig. S8.** (a) The negative-mode ESI-MS spectrum and (b) the overview mass spectrum of **5-Sm** dissolved by DMSO with methanol as mobile phase; (c)


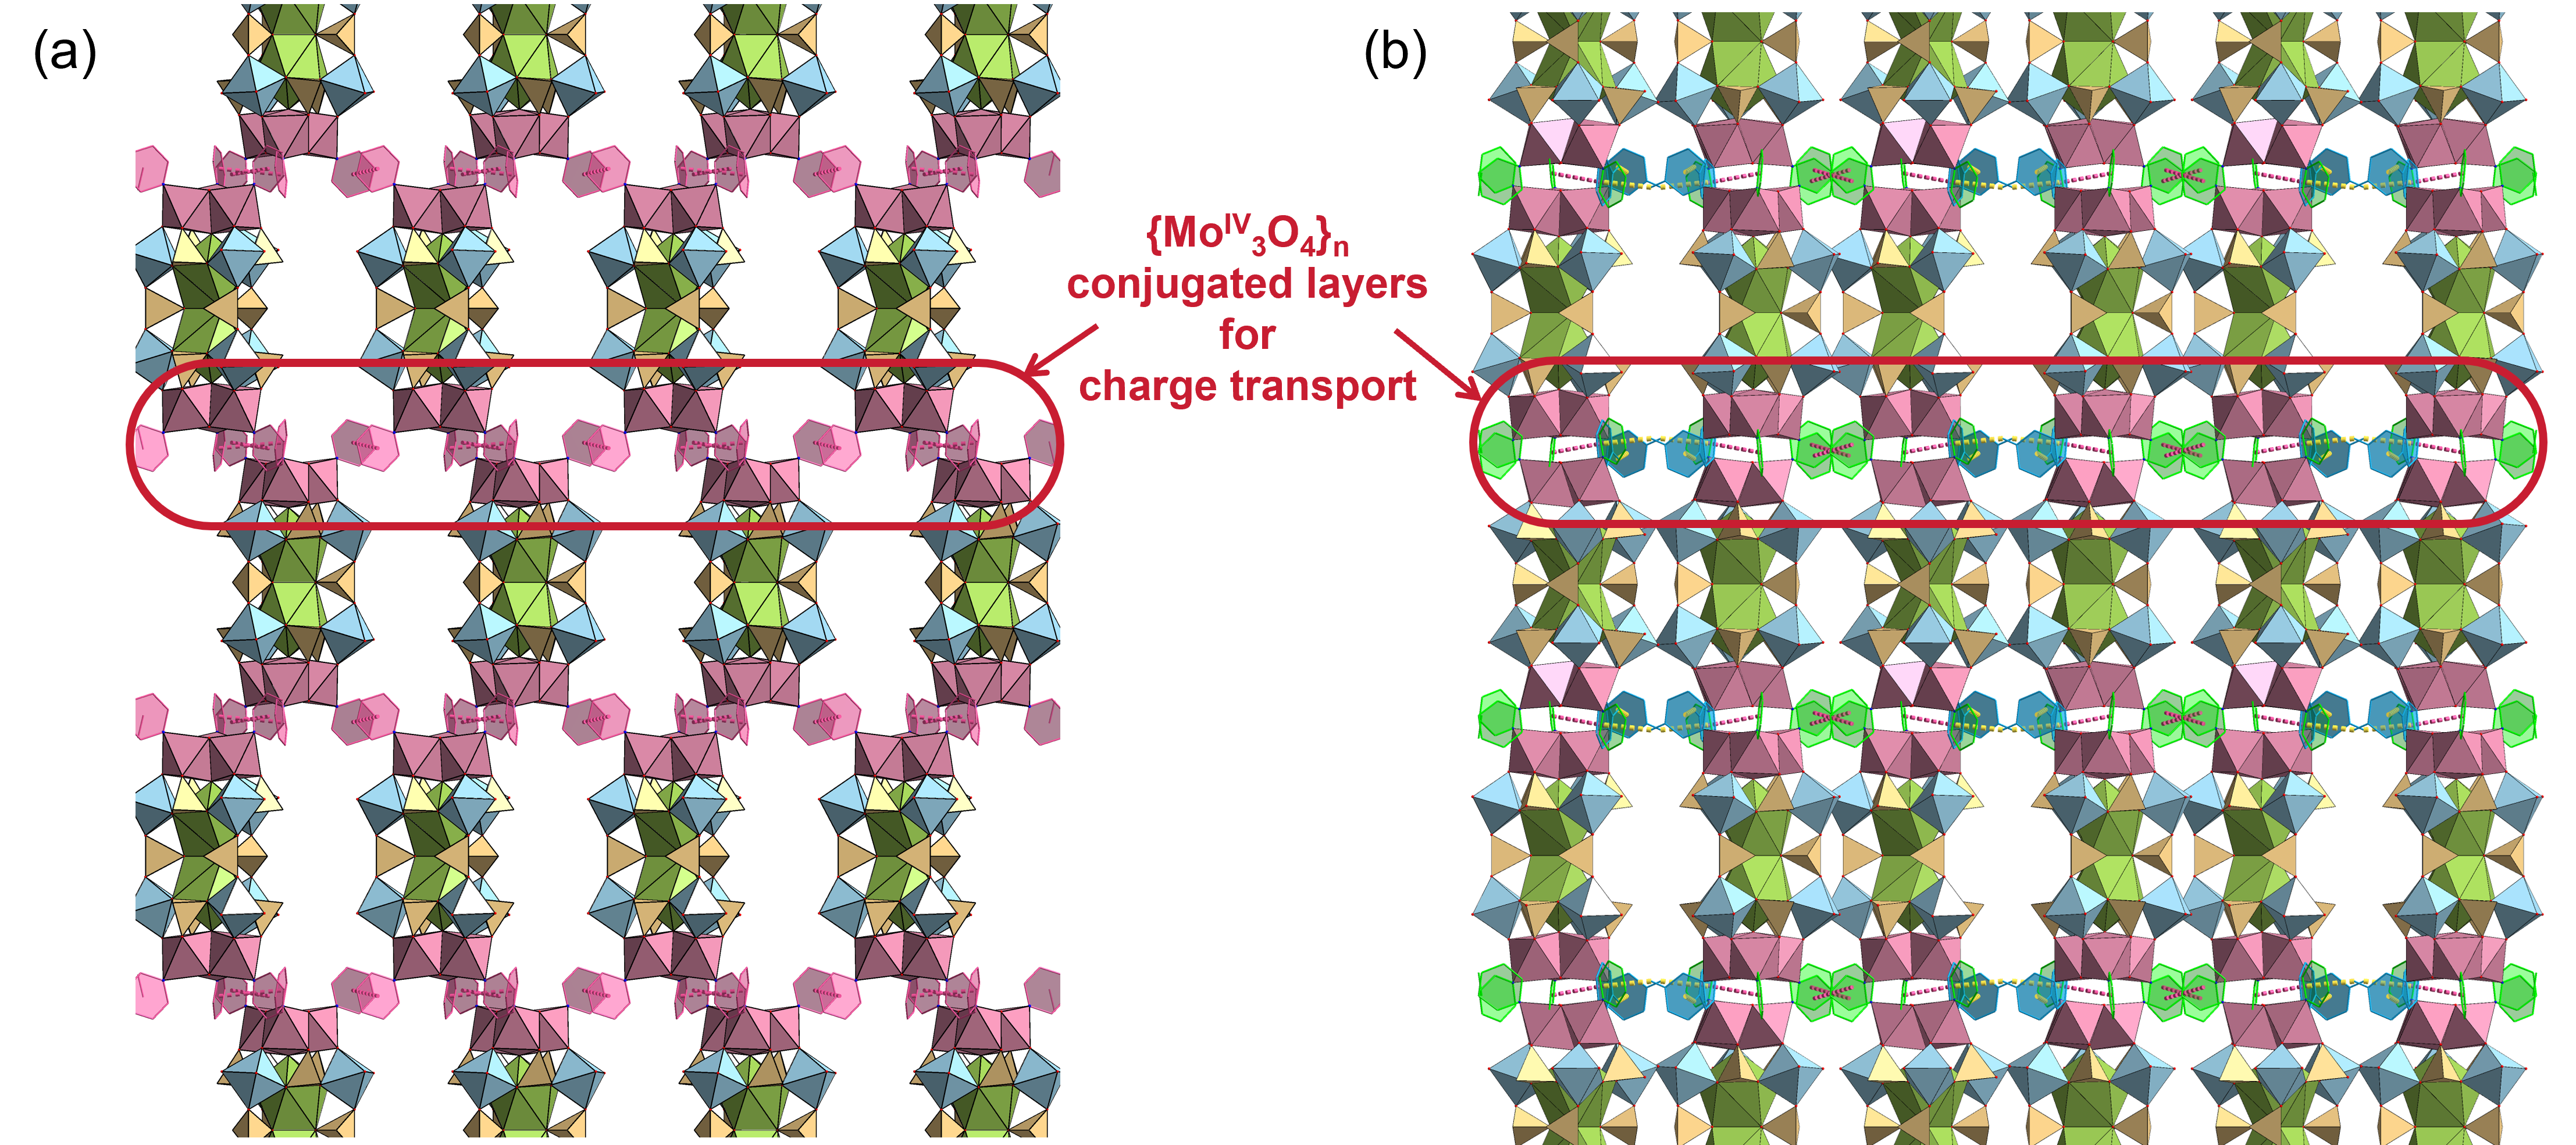


**Fig. S9**. (a) The sideview of d-π···π-d stacking between the 2D MoIV3 bilayers pillared by lanthanoid dimers for hexagonal symmetric phase. (b) The sideview of tetragonal d-π···π-d stacking with MoIV-π conjugated bilayers. Color code: MoVIO6, pale blue; MoIV3O4, pinkish purple; HPIIIO3 or PVO4, yellow; LnIII dimer, green; py rings, light green or sky blue.


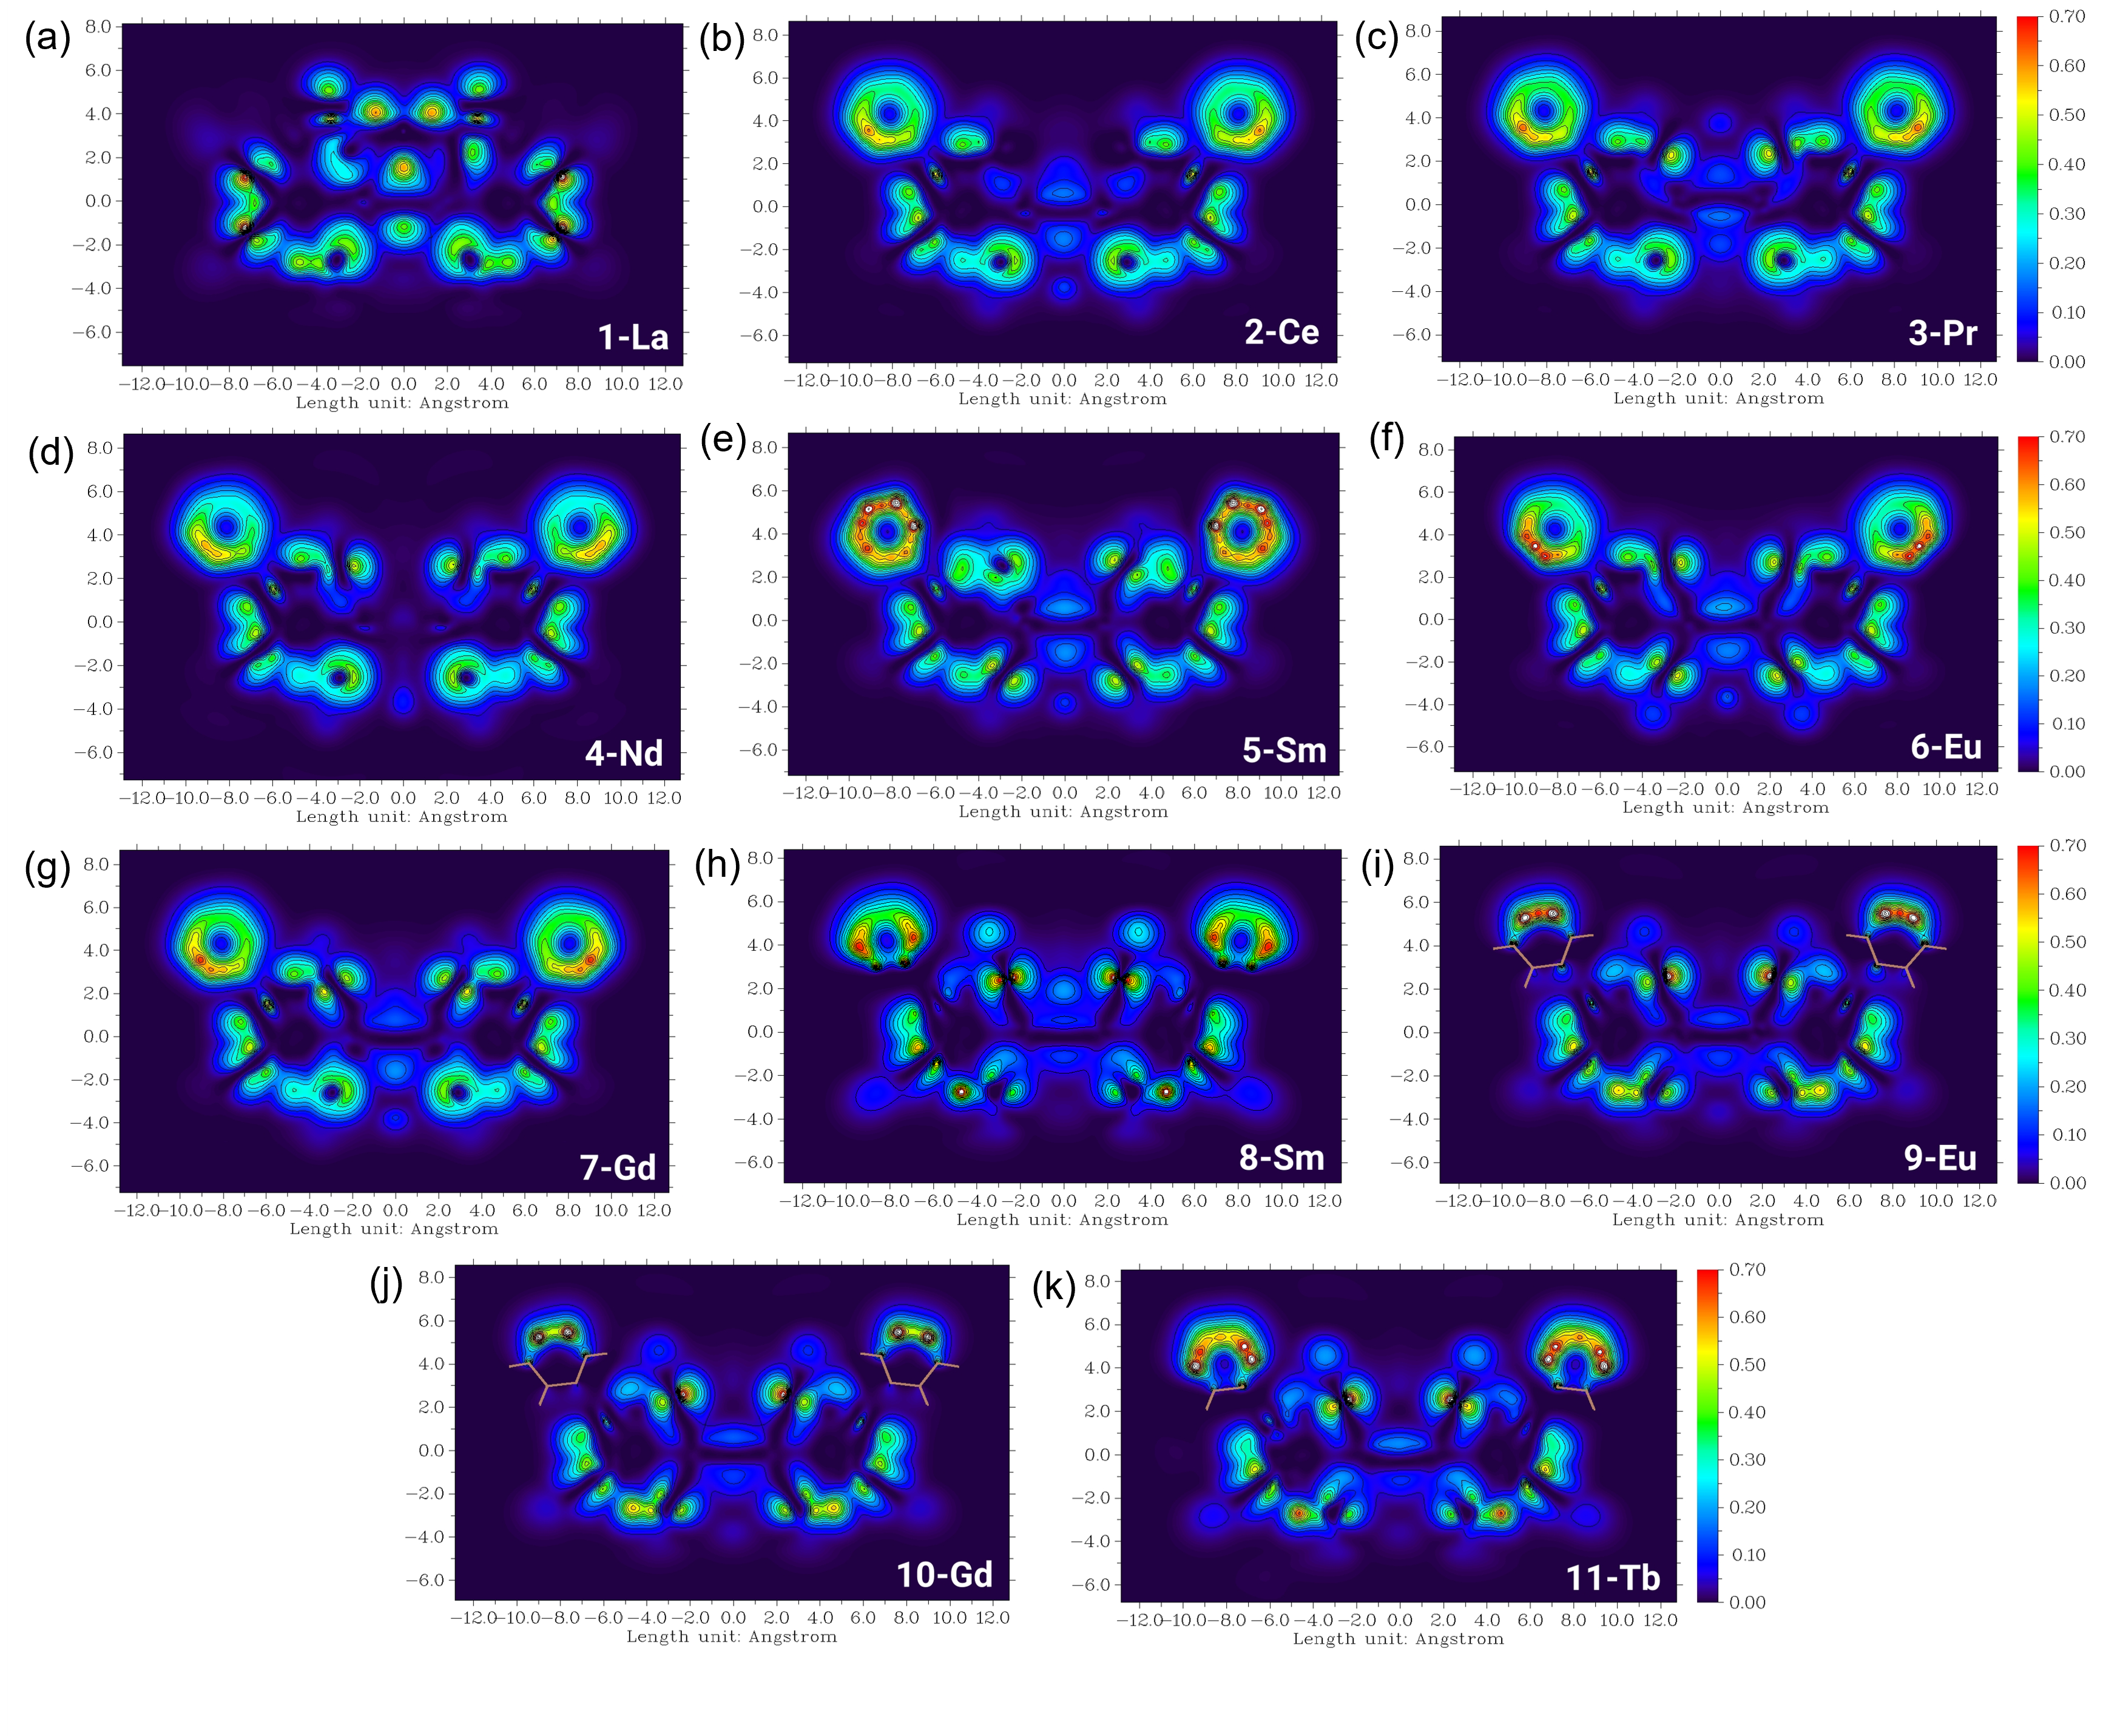


**Fig. S10.** Color-filled maps of LOL-*π* on the *xz* plane of **1**–**11** single molecules at 0.6 Å above the plane based on DFT calculations

**Supplementary Tables**

**Table S1** *π*···*π* interaction distance of hexagonal **1**–**7**

| POMoIV | **1-La** | **2-Ce** | **3-Pr** | **4-Nd** | **5-Sm** | **6-Eu** | **7-Gd** |
| --- | --- | --- | --- | --- | --- | --- | --- |
| Distance (Å) | 3.796(9) | 3.850(13) | 3.857(5) | 3.838(5) | 3.652(13) | 3.653(13) | 3.770(11) |

**Table S2** Bond length of Ln-O and Ln···Ln distance of hexagonal **1**–**7**

| Bond length (Å) | **1-La** | **2-Ce** | | **3-Pr** | | **4-Nd** | | **5-Sm** | | **6-Eu** | | **7-Gd** | |
| --- | --- | --- | --- | --- | --- | --- | --- | --- | --- | --- | --- | --- | --- |
| Ln-Oa | 2.657(7) | 2.695(9) | | 2.617(3) | | 2.630(3) | | 2.487(11) | | 2.450(12) | | 2.648(10) | |
| Ln-O-MoIV | 2.59(1) | 2.565(11) | | 2.545(5) | | 2.549(4) | | 2.584(15) | | 2.570(13) | | 2.558(9) | |
| Ln-O-PIII | 2.549(5) | 2.532(7) | | 2.524(3) | | 2.526(3) | | 2.506(9) | | 2.483(10) | | 2.497(6) | |
| Ln···Ln distance | | 3.8278(13) | | 3.796(2) | | 3.8049(7) | | 3.8009(7) | | 3.7407(19) | | 3.7248(19) | | 3.7367(13) |

**Table S3**  Bond length of Ln-O and Ln···Ln distance of tetragonal **8**–**11**

| Bond length (Å) | **8-Sm** | **9-Eu** | **10-Gd** | **11-Tb** |
| --- | --- | --- | --- | --- |
| Ln-Oa | 2.84(2) | 2.88(2) | 2.93(2) | 2.96(2) |
| Ln-OMoIV | 2.575(11) | 2.561(10) | 2.573(10) | 2.553(13) |
| Ln···Ln distance | 3.746 | 3.723 | 3.709 | 3.691 |

**Table S4**  Interlayer spacing of the MoIV3 conjugating layers

| Ln2@POMoIV | **1-La** | **2-Ce** | **3-Pr** | **4-Nd** | **5-Sm** | **6-Eu** | **7-Gd** | **8-Sm** | **9-Eu** | **10-Gd** | **11-Tb** |
| --- | --- | --- | --- | --- | --- | --- | --- | --- | --- | --- | --- |
| Interlayer spacing (Å) | 32.817 | 32.698 | 32.694 | 32.659 | 32.381 | 32.361 | 32.561 | 31.351 | 31.304 | 31.282 | 31.242 |

**Table S5**  XPS peak analysis of Mo 3*d* from the literatures and to assign species from the present measurement of **5**–**7** and **11** (C 1*s* calibrated to 284.8 eV)

| Binding Energy (eV) | MoIV 3*d*3/2 | MoIV 3*d*5/2 | MoVI 3*d*3/2 | MoVI 3*d*5/2 |
| --- | --- | --- | --- | --- |
| **5-Sm** | 233.48 | 230.36 | 235.23 | 232.07 |
| **6-Eu** | 233.49 | 230.35 | 235.36 | 232.20 |
| **7-Gd** | 233.45 | 230.40 | 235.31 | 232.26 |
| **11-Tb** | 233.55 | 230.50 | 235.27 | 232.08 |
| H4[Mo@MoIV6MoV6MoVI8O54(OH)4py6] S1 | 233.27 | 230.11 | 235.46 | 232.11 |
| [MoIV3O4]4+ S3 | 234.7 | 231.8 | - | - |
| Na2MoO4 S4 | - | - | 235.2 | 232.1 |
| MoO3 S4 | - | - | 235.6 | 232.5 |

**Table S6** BVS analysis for *μ*2-OH groups in {Ln2(MoIV3)} clusters

| Atom | BVS result of **1-La** |
| --- | --- |
| O1 | 2.716 |
| O3 | 2.198 |
| O4 | 2.022 |
| O5 | 2.084 |
| O6 | 2.120 |
| O7 | 2.141 |
| O8 | 1.918 |
| O9 | 1.911 |
| O11 | 2.183 |
| O12 | 1.997 |

| Atom | BVS result of **2-Ce** |
| --- | --- |
| O1 | 2.496 |
| O3 | 2.195 |
| O4 | 2.097 |
| O5 | 1.894 |
| O6 | 2.191 |
| O7 | 2.092 |
| O8 | 1.955 |
| O9 | 2.031 |
| O11 | 2.112 |
| O12 | 2.205 |

| Atom | BVS result of **3-Pr** |
| --- | --- |
| O1 | 2.181 |
| O2 | 2.157 |
| O3 | 2.132 |
| O4 | 2.097 |
| O5 | 2.142 |
| O6 | 2.109 |
| O7 | 2.133 |
| O8 | 2.032 |
| O9 | 2.261 |
| O10 | 2.479 |
| O11 | 2.115 |

| Atom | BVS result of **4-Nd** |
| --- | --- |
| O1 | 2.325 |
| O3 | 2.115 |
| O4 | 2.128 |
| O5 | 2.076 |
| O6 | 2.118 |
| O7 | 2.147 |
| O8 | 2.067 |
| O9 | 2.060 |
| O10 | 2.531 |
| O11 | 2.283 |
| O12 | 2.043 |

| Atom | BVS result of **5-Sm** |
| --- | --- |
| O1 | 2.019 |
| O2 | 2.028 |
| O3 | 2.207 |
| O4 | 2.142 |
| O5 | 1.995 |
| O6 | 1.881 |
| O7 | 2.148 |
| O8 | 2.963 |
| O10 | 2.142 |
| O11 | 2.181 |

| Atom | BVS result of **6-Eu** |
| --- | --- |
| O1 | 2.019 |
| O2 | 2.028 |
| O3 | 2.207 |
| O4 | 2.142 |
| O5 | 1.995 |
| O6 | 1.881 |
| O7 | 2.148 |
| O8 | 2.963 |
| O10 | 2.142 |
| O11 | 2.181 |

| Atom | BVS result of **7-Gd** |
| --- | --- |
| O1 | 2.377 |
| O3 | 2.128 |
| O4 | 2.147 |
| O5 | 2.044 |
| O6 | 2.231 |
| O7 | 2.098 |
| O8 | 2.110 |
| O9 | 2.199 |
| O10 | 2.549 |
| O11 | 2.266 |
| O12 | 2.121 |

| Atom | BVS result of **8-Sm** |
| --- | --- |
| O7 | 2.183 |
| O8 | 2.157 |
| O9 | 2.160 |
| O10 | 2.015 |
| O11 | 2.208 |
| O12 | 2.187 |
| O13 | 2.134 |
| O14 | 2.187 |
| O15 | 2.151 |
| O16 | 2.271 |
| O17 | 2.165 |
| O18 | 2.177 |
| O19 | 2.204 |
| O20 | 1.964 |
| O21 | 2.100 |
| O22 | 2.165 |
| O23 | 2.126 |
| O24 | 2.278 |
| O25 | 1.981 |
| O29 | 2.290 |
| O30 | 2.175 |
| O31 | 2.177 |
| O32 | 2.118 |
| O33 | 2.268 |
| O34 | 2.089 |

| Atom | BVS result of **9-Eu** |
| --- | --- |
| O7 | 2.116 |
| O8 | 2.071 |
| O9 | 2.086 |
| O10 | 1.882 |
| O11 | 2.152 |
| O12 | 2.096 |
| O13 | 1.982 |
| O14 | 2.193 |
| O15 | 2.058 |
| O16 | 2.205 |
| O17 | 2.098 |
| O18 | 2.160 |
| O19 | 1.910 |
| O20 | 1.989 |
| O21 | 2.004 |
| O22 | 1.987 |
| O23 | 2.123 |
| O24 | 2.206 |
| O25 | 1.844 |
| O26 | 2.354 |
| O27 | 2.859 |
| O28 | 2.489 |
| O29 | 2.238 |
| O30 | 2.110 |
| O31 | 2.145 |
| O32 | 2.092 |
| O33 | 2.202 |
| O34 | 2.119 |

| Atom | BVS result of **10-Gd** |
| --- | --- |
| O7 | 2.125 |
| O8 | 1.966 |
| O9 | 1.983 |
| O10 | 1.857 |
| O11 | 1.977 |
| O12 | 2.006 |
| O13 | 2.000 |
| O14 | 1.773 |
| O15 | 2.020 |
| O16 | 1.822 |
| O17 | 1.694 |
| O18 | 1.753 |
| O19 | 1.912 |
| O20 | 1.841 |
| O21 | 1.805 |
| O22 | 1.944 |
| O23 | 1.761 |
| O25 | 1.904 |
| O29 | 2.157 |
| O30 | 2.083 |
| O31 | 2.146 |
| O32 | 2.078 |
| O33 | 2.256 |
| O34 | 2.058 |

| Atom | BVS result of **11-Tb** |
| --- | --- |
| O7 | 2.107 |
| O8 | 2.099 |
| O9 | 2.109 |
| O10 | 1.941 |
| O11 | 2.139 |
| O12 | 2.212 |
| O13 | 2.111 |
| O14 | 2.175 |
| O15 | 2.163 |
| O16 | 2.162 |
| O17 | 2.141 |
| O18 | 2.099 |
| O19 | 2.160 |
| O20 | 1.921 |
| O21 | 2.002 |
| O22 | 1.873 |
| O23 | 2.394 |
| O24 | 2.311 |
| O25 | 1.962 |
| O26 | 2.516 |
| O27 | 2.595 |
| O28 | 2.962 |
| O29 | 2.260 |
| O30 | 2.207 |
| O31 | 2.157 |
| O32 | 2.090 |
| O33 | 2.353 |
| O34 | 1.997 |

*The disordered O atoms of low occupation are omitted.

**Table S7** Crystal data and structure refinement for hexagonal **1**–**3**

| Identification code | **1-La** | **2-Ce** | **3-Pr** |
| --- | --- | --- | --- |
| CCDC Nos. | 2307759 | 2307760 | 2307761 |
| Empirical formula | C50H85La2Mo12N10O66P9 | C50H85Ce2Mo12N10O66P9 | C50H85Mo12N10O66P9Pr2 |
| Formula weight | 3590.10 | 3592.51 | 3594.10 |
| Temperature/K | 100.01(10) | 100.02 | 149.97 |
| Crystal system | hexagonal | hexagonal | hexagonal |
| Space group | *P*63/*m* | *P*63/*m* | *P*63/*m* |
| *a*/Å | 15.4239(2) | 15.3622(9) | 15.3302(5) |
| *b*/Å | 15.4239(2) | 15.3622(9) | 15.3302(5) |
| *c*/Å | 32.8171(4) | 32.698(2) | 32.6940(10) |
| *α*/° | 90 | 90 | 90 |
| *β*/° | 90 | 90 | 90 |
| *γ*/° | 120 | 120 | 120 |
| Volume/Å3 | 6761.14(19) | 6682.7(9) | 6654.2(5) |
| Z | 2 | 2 | 2 |
| *ρ*calcg/cm3 | 1.763 | 1.785 | 1.794 |
| *μ*/mm‑1 | 1.877 | 1.941 | 1.998 |
| F(000) | 3472.0 | 3476.0 | 3480.0 |
| Index ranges | -23 ≤ h ≤ 20  -22 ≤ k ≤ 22  -46 ≤ l ≤ 47 | -18 ≤ h ≤ 18  -18 ≤ k ≤ 18  -39 ≤ l ≤ 39 | -20 ≤ h ≤ 22,  -20 ≤ k ≤ 21,  -44 ≤ l ≤ 47 |
| Reflections collected | 102245 | 50012 | 63578 |
| Independent reflections | 8386 [Rint = 0.0389, Rsigma = 0.0190] | 4159 [Rint = 0.0625, Rsigma = 0.0255] | 7478 [Rint = 0.0443, Rsigma = 0.0275] |
| Data/restraints/parameters | 8386/735/483 | 4159/686/485 | 7478/481/405 |
| Goodness-of-fit on F2 | 1.151 | 1.158 | 1.077 |
| Final R indexes [I>=2σ (I)] | R1 = 0.0797,  wR2 = 0.1922 | R1 = 0.0598,  wR2 = 0.1794 | R1 = 0.0388,  wR2 = 0.0985 |
| Final R indexes [all data] | R1 = 0.1018,  wR2 = 0.2080 | R1 = 0.0640,  wR2 = 0.1848 | R1 = 0.0590,  wR2 = 0.1123 |
| Largest diff. peak/hole / e Å-3 | 2.72/-3.79 | 1.09/-1.37 | 1.37/-1.17 |

**Table S8** Crystal data and structure refinement for hexagonal **4**–**6**

| Identification code | **4-Nd** | **5-Sm** | **6-Eu** |
| --- | --- | --- | --- |
| CCDC Nos. | 2307762 | 2307763 | 2307764 |
| Empirical formula | C50H85Mo12N10Nd2O66P9 | C50H85Mo12N10O66P9Sm2 | C50H85Eu2Mo12N10O66P9 |
| Formula weight | 3600.76 | 3612.98 | 3616.21 |
| Temperature/K | 100.05 | 99.99(10) | 100.00(10) |
| Crystal system | hexagonal | hexagonal | hexagonal |
| Space group | *P*63/*m* | *P*63/*m* | *P*63/*m* |
| *a*/Å | 15.3608(6) | 15.7021(2) | 15.7448(3) |
| *b*/Å | 15.3608(6) | 15.7021(2) | 15.7448(3) |
| *c*/Å | 32.6591(14) | 32.3813(4) | 32.3612(4) |
| *α*/° | 90 | 90 | 90 |
| *β*/° | 90 | 90 | 90 |
| *γ*/° | 120 | 120 | 120 |
| Volume/Å3 | 6673.6(6) | 6914.2(2) | 6947.5(2) |
| Z | 2 | 2 | 2 |
| *ρ*calcg/cm3 | 1.792 | 1.735 | 1.729 |
| *μ*/mm‑1 | 2.040 | 2.067 | 2.115 |
| F(000) | 3484.0 | 3492.0 | 3496.0 |
| Index ranges | -17 ≤ h ≤ 24,  -23 ≤ k ≤ 24,  -51 ≤ l ≤ 51 | -17 ≤ h ≤ 19,  -16 ≤ k ≤ 19,  -40 ≤ l ≤ 40 | -19 ≤ h ≤ 19,  -19 ≤ k ≤ 19,  -40 ≤ l ≤ 40 |
| Reflections collected | 100875 | 24293 | 30511 |
| Independent reflections | 9524 [Rint = 0.0483, Rsigma = 0.0249] | 4769 [Rint = 0.0726, Rsigma = 0.0436] | 4786 [Rint = 0.0770, Rsigma = 0.0486] |
| Data/restraints/parameters | 9524/616/478 | 4769/591/387 | 4786/557/385 |
| Goodness-of-fit on F2 | 1.099 | 1.167 | 1.137 |
| Final R indexes [I>=2σ (I)] | R1 = 0.0501,  wR2 = 0.1474 | R1 = 0.0833,  wR2 = 0.2071 | R1 = 0.0835,  wR2 = 0.1946 |
| Final R indexes [all data] | R1 = 0.0686,  wR2 = 0.1628 | R1 = 0.1029,  wR2 = 0.2259 | R1 = 0.1102,  wR2 = 0.2174 |
| Largest diff. peak/hole / e Å-3 | 1.90/-2.09 | 2.85/-1.77 | 2.53/-2.31 |

**Table S9**  Crystal data and structure refinement for hexagonal **7-Gd** and tetragonal **8** and **9**

| Identification code | **7-Gd** | **8-Sm** | **9-Eu** |
| --- | --- | --- | --- |
| CCDC Nos. | 2307765 | 2307766 | 2307767 |
| Empirical formula | C50H85Gd2Mo12N10O66P9 | C45H84Mo12N9O68P9Sm2 | C45H84Eu2Mo12N9O68P9 |
| Formula weight | 3626.79 | 3569.92 | 3573.14 |
| Temperature/K | 99.98(10) | 100.01(10) | 100(3) |
| Crystal system | hexagonal | tetragonal | tetragonal |
| Space group | *P*63/*m* | *P*42/*m* | *P*42/*m* |
| *a*/Å | 15.3617(5) | 20.1455(3) | 20.2729(3) |
| *b*/Å | 15.3617(5) | 20.1455(3) | 20.2729(3) |
| *c*/Å | 32.5611(6) | 31.3507(5) | 31.3042(5) |
| *α*/° | 90 | 90 | 90 |
| *β*/° | 90 | 90 | 90 |
| *γ*/° | 120 | 90 | 90 |
| Volume/Å3 | 6654.4(5) | 12723.4(4) | 12865.7(4) |
| Z | 2 | 4 | 4 |
| *ρ*calcg/cm3 | 1.810 | 1.864 | 1.845 |
| *μ*/mm‑1 | 2.262 | 2.246 | 2.283 |
| F(000) | 3500.0 | 6896.0 | 6904.0 |
| Index ranges | -18 ≤ h ≤ 17,  -16 ≤ k ≤ 17,  -38 ≤ l ≤ 32 | -23 ≤ h ≤ 23,  -22 ≤ k ≤ 21,  -37 ≤ l ≤ 36 | -24 ≤ h ≤ 24,  -24 ≤ k ≤ 24,  -37 ≤ l ≤ 35 |
| Reflections collected | 27311 | 74143 | 92251 |
| Independent reflections | 4004 [Rinl = 0.0461, Rsigma = 0.0272] | 11450 [Rint = 0.0663, Rsigma = 0.0414] | 11598 [Rint = 0.0548, Rsigma = 0.0294] |
| Data/restraints/parameters | 4004/623/478 | 11450/1733/1269 | 11598/1675/1268 |
| Goodness-of-fit on F2 | 1.163 | 1.178 | 1.162 |
| Final R indexes [I>=2σ (I)] | R1 = 0.0616,  wR2 = 0.1564 | R1 = 0.1046,  wR2 = 0.2098 | R1 = 0.0898,  wR2 = 0.2041 |
| Final R indexes [all data] | R1 = 0.0877,  wR2 = 0.1788 | R1 = 0.1509,  wR2 = 0.2375 | R1 = 0.1139,  wR2 = 0.2200 |
| Largest diff. peak/hole / e Å-3 | 1.80/-1.05 | 2.20/-1.64 | 2.41/-1.26 |

**Table S10** Crystal data and structure refinement for tetragonal **10-Gd** and**11-Tb**

| Identification code | **10-Gd** | **11-Tb** |
| --- | --- | --- |
| CCDC Nos. | 2307768 | 2307769 |
| Empirical formula | C45H84Gd2Mo12N9O68P9 | C45H84Mo12N9O68P9Tb2 |
| Formula weight | 3583.72 | 3587.06 |
| Temperature/K | 100.00(1) | 100.01(10) |
| Crystal system | tetragonal | tetragonal |
| Space group | *P*42/*m* | *P*42/*m* |
| *a*/Å | 20.1964(3) | 20.2052(5) |
| *b*/Å | 20.1964(3) | 20.2052(5) |
| *c*/Å | 31.2817(4) | 31.2415(9) |
| *α*/° | 90 | 90 |
| *β*/° | 90 | 90 |
| *γ*/° | 90 | 90 |
| Volume/Å3 | 12759.6(4) | 12754.3(7) |
| Z | 4 | 4 |
| *ρ*calcg/cm3 | 1.866 | 1.868 |
| *μ*/mm‑1 | 2.359 | 2.429 |
| F(000) | 6912.0 | 6920.0 |
| Index ranges | -23 ≤ h ≤ 24,  -24 ≤ k ≤ 24,  -37≤ l ≤ 37 | -20 ≤ h ≤ 24,  -24 ≤ k ≤ 23,  -37 ≤ l ≤ 29 |
| Reflections collected | 101005 | 47468 |
| Independent reflections | 11489 [Rint = 0.0496, Rsigma = 0.0255] | 13182 [Rint = 0.0853, Rsigma = 0.0893] |
| Data/restraints/parameters | 11489/1728/1233 | 13182/1732/1269 |
| Goodness-of-fit on F2 | 1.180 | 1.058 |
| Final R indexes [I>=2σ (I)] | R1 = 0.0877,  wR2 = 0.2001 | R1 = 0.0932,  wR2 = 0.2173 |
| Final R indexes [all data] | R1 = 0.1118,  wR2 = 0.2163 | R1 = 0.1534,  wR2 = 0.2451 |
| Largest diff. peak/hole / e Å-3 | 2.46/-1.32 | 1.92/-0.80 |
| Flack parameter | - | - |

**Explanations for A and B alerts in crystal structures**

**2-Ce (CCDC 2307760)**

Alert level B

PLAT420_ALERT_2_B D-H Bond Without Acceptor O16--H16A

RESPONSE: Because of the disorder of solvent H2O.

**6-Eu (CCDC: 2307764)**

Alert level B

PLAT420_ALERT_2_B D-H Bond Without Acceptor O15 --H15B . Please Check

RESPONSE: Because of the disorder of solvent water.

PLAT420_ALERT_2_B D-H Bond Without Acceptor O16 --H16B . Please Check

RESPONSE: Because of the disorder of solvent water.

**8-Sm (CCDC: 2307766)**

Alert level B

PLAT420_ALERT_2_B D-H Bond Without Acceptor O35 --H35B . Please Check

RESPONSE: Because of the disorder of solvent H2O.

PLAT420_ALERT_2_B D-H Bond Without Acceptor O42 --H42B . Please Check

RESPONSE: Because of the disorder of solvent H2O.

**11-Tb (CCDC: 2307769)**

Alert level B

PLAT420_ALERT_2_B D-H Bond Without Acceptor O35 --H35B .

RESPONSE: Because of the disorder of solvent H2O.

PLAT420_ALERT_2_B D-H Bond Without Acceptor O35 --H35C .

RESPONSE: Because of the disorder of solvent H2O.

PLAT420_ALERT_2_B D-H Bond Without Acceptor O53 --H53B .

RESPONSE: Because of the disorder of solvent H2O.

**Supplementary References**

S1 Luo, B. & Xu, L. POM-FLPs: [MoIV3]n-polyoxometalate bifunctional catalysis by [MoIV3]n–Om Lewis pairs frustrated by triangular MoIV–MoIV bonds. *Dalton Trans.* **48**, 6892–6898 (2019).

S2 Bino, A., Cotton, F. A. & Dori, Z. A trinuclear molybdenum (IV) cluster compound having an unusual structure and unusual stability. *J. Am. Chem. Soc.* **100**, 5252–5253 (1978).

S3. Shibahara, T., Tsuru, H. & Kuroya, H. XPS spectra of incomplete cubane-type cluster with Mo3O4-nSn4+ core (n= 0-4). *Inorg. Chim. Acta* **150**, 167-168 (1988).

S4. Swartz, W. & Hercules, D.M. X-ray photoelectron spectroscopy of molybdenum compounds. Use of electron spectroscopy for chemical analysis (ESCA) in quantitative analysis. *Anal. Chem.* **43**, 1774-1779 (1971).
